1 **Title: The *Phaeodactylum tricornutum* Diaminopimelate Decarboxylase was**  
2 **Acquired via Horizontal Gene Transfer from Bacteria and Displays Substrate**  
3 **Promiscuity**

4

5 **Vincent A. Bielinski,<sup>a\*</sup> John K. Brunson,<sup>a,b\*</sup> Agnidipta Ghosh,<sup>c</sup> Mark A.**  
6 **Moosburner,<sup>a,d</sup> Erin A. Garza,<sup>a</sup> Zoltan Fussy,<sup>a,e</sup> Jing Bai,<sup>a</sup> Shaun M.K. McKinnie,<sup>f</sup>**  
7 **Bradley S. Moore,<sup>b,g</sup> Andrew E. Allen,<sup>a,b</sup> Steven C. Almo,<sup>c</sup> and Christopher L.**  
8 **Dupont<sup>a,1</sup>**

9

10 <sup>a</sup> J. Craig Venter Institute, La Jolla CA 92037

11 <sup>b</sup> Center for Marine Biotechnology and Biomedicine, Scripps Institution of  
12 Oceanography, UCSD, La Jolla CA 92093

13 <sup>c</sup> Department of Biochemistry, Albert Einstein College of Medicine, NY 10461

14 <sup>d</sup> Integrative Oceanography Division, Scripps Institution of Oceanography, University  
15 of California San Diego, La Jolla CA 92037

16 <sup>e</sup> Faculty of Science, Charles University, BIOCEV, Vestec, Czech Republic

17 <sup>f</sup> Department of Chemistry and Biochemistry, University of California, Santa Cruz,  
18 Santa Cruz, CA, 95064

19 <sup>g</sup> Skaggs School of Pharmacy and Pharmaceutical Sciences, University of California,  
20 San Diego, La Jolla, CA 92093

21 \*These authors contributed equally to this work

22

23

24 <sup>1</sup> Address correspondence to [cdupont@jcvl.org](mailto:cdupont@jcvl.org)

25

26 **Running title: A Novel DAPDC Displays Substrate Promiscuity**

27

28

29

30

31

32

33

34 The author(s) responsible for distribution of materials integral to the findings  
35 presented in this article in accordance with the policy described in the Instructions for  
36 Authors ([www.plantcell.org](http://www.plantcell.org)) is: Christopher L. Dupont ([cdupont@jcvl.org](mailto:cdupont@jcvl.org))

37 **ABSTRACT**

38           Diatoms are predicted to synthesize certain amino acids within the chloroplast,  
39 including L-lysine via a diaminopimelate-dependent pathway. Herein, we report that  
40 the model diatom, *Phaeodactylum tricornutum*, possesses a chimeric lysine  
41 biosynthetic pathway, which coalesces bacterial and plant genes, and is terminated  
42 by a chloroplast-localized diaminopimelate decarboxylase (DAPDC, *PtLYSA*). We  
43 show that while RNAi ablation of *PtLYSA* is either synthetically lethal or concomitant  
44 with a slower growth rate, Cas9-mediated mutagenesis of *PtLYSA* results in recovery  
45 of heterozygous cells lines, suggesting that *PtLYSA* is an essential gene. Previously  
46 characterized DAPDCs are unique within the PLP-dependent decarboxylases where  
47 catalysis occurs at the D-stereocenter of the substrate and display a strict  
48 stereochemical preference for a (D,L)- or *meso*-substrate and not the D,D- or L,L-  
49 isomers of diaminopimelate (DAP) to synthesize L-lysine. Using decarboxylation  
50 assays and differential scanning calorimetry analyses, we validate that *PtLYSA* is a  
51 *bona fide* DAPDC and uncover its unexpected stereopromiscuous behavior in  
52 substrate specificity. The crystal structure of *PtLYSA* confirms the enzyme is an  
53 obligate homodimer in which both protomers reciprocally participate in the active site.  
54 The structure underscores features unique to the *PtLYSA* clan of DAPDC and  
55 provides structural insight into the determinants responsible for the substrate-  
56 promiscuity observed in *PtLYSA*.

57  
58  
59  
60  
61  
62  
63  
64  
65  
66  
67  
68  
69  
70  
71  
72  
73  
74  
75  
76  
77  
78

## 79 INTRODUCTION

80 Lysine plays a variety of important roles in biology across the tree of life.  
81 Besides its role as an essential amino acid required for protein synthesis, L-lysine  
82 can also be degraded into the lipid building block acetyl-CoA via lysine catabolism  
83 pathways in some organisms, including *E. coli*, *Arabidopsis* and humans (Knorr et al.,  
84 2018; Zhu et al., 2004; Chang, 1978). In Gram-positive *Staphylococcus* strains, L-  
85 lysine is found as a structural component of the peptidoglycan layer and the  
86 biosynthetic enzymes required for peptidoglycan production are involved in  $\beta$ -lactam  
87 resistance (De Lencastre et al., 1999). Two main routes for the *de novo* production of  
88 L-lysine exist in nature, although new and unique pathways are still being discovered  
89 in bacteria (Price et al., 2018). Higher fungi, euglenids and some bacteria produce L-  
90 lysine from homocitrate via the  $\alpha$ -aminoadipate pathway (Xu et al., 2006; Kosuge et  
91 al., 1998). Land plants and most bacteria employ four biochemically distinct  
92 variations of the diaminopimelate (DAP) pathway to synthesize L-lysine from an  
93 aspartic acid precursor (Pratelli and Pilot, 2014; Kirma et al., 2012; Jander and  
94 Joshji, 2009; Hudson et al., 2005). In plants, the pathway includes an  
95 aminotransferase activity that produces L,L-DAP as an intermediate. L,L-DAP  
96 undergoes a subsequent epimerization to *meso*-DAP (D,L-DAP), the substrate for the  
97 final enzymatic step, which is catalyzed by diaminopimelate decarboxylase (DAPDC)  
98 to produce L-lysine (Bukhari and Taylor, 1971; White and Kelly, 1965; Dewey and  
99 Work, 1952).

100 DAPDC proteins are unique in the amino acid decarboxylase family as the  
101 only members to carry out decarboxylation exclusively at the D-stereocenter of the  
102 substrate. All DAPDC enzymes characterized thus far display a strict substrate  
103 preference for *meso*-DAP over other DAP stereoisomers and function as  
104 homodimeric complexes (Peverelli et al., 2016, Peverelli and Perugini, 2015, Griffin  
105 et al., 2012; Hu et al., 2008, Hutton et al., 2007). Elimination of CO<sub>2</sub> from *meso*-DAP  
106 by DAPDC requires the cofactor pyridoxal-5'-phosphate (PLP), which forms a Schiff  
107 base with a conserved lysine residue (K54 in *E. coli* LYSA, UNIPROT ID P00861) in  
108 the active site of the enzyme (Ray et al., 2002). PLP facilitates the decarboxylation of  
109 *meso*-DAP substrate via formation of a Schiff base involving the  $\alpha$ -amino group of  
110 the *meso*-DAP D-stereocenter, while distal residues in the DAPDC catalytic pocket  
111 interact with the L-stereocenter of *meso*-DAP (Hu et al., 2008, Gokulan et al., 2003).

112 The structures of DAPDC orthologs reveal that both protomers of the dimer  
113 contribute to form the active sites in which a conserved arginine from the EPGR motif  
114 directs preference for *meso*-DAP (Crowther et al., 2019; Son and Kim, 2018; Weyand  
115 et al., 2009; Hu et al., 2008; Gokulan et al., 2003; Ray et al., 2002). These structures  
116 evince that DAPDC orthologs have a variable and flexible active site loop that shields  
117 the active site ligands from bulk solvent during catalysis (Hu et al., 2008).

118 In photosynthetic eukaryotes studied thus far, it appears the terminal steps of  
119 lysine biosynthesis occur exclusively within the chloroplast (Hudson, 2006; Perl,  
120 1992; Wallsgrove, 1980). It has been postulated that lysine biosynthetic gene  
121 clusters from the cyanobacterial lineage were obtained via the primary plastid  
122 endosymbiotic event that resulted in the emergence of Archaeplastida that  
123 encompass glaucophytes, red and green algae and land plants (Reyes-Prieto, 2012;  
124 Kidron, 2007; Velasco, 2002). Diatoms are ubiquitous ocean phytoplankton and  
125 major contributors to the carbon cycle (Armbrust, 2009), which were derived from a  
126 secondary endosymbiosis event and thrive in upwelling-induced, nutrient-rich  
127 conditions making them the basis for the world's shortest and most energy-efficient  
128 food webs. Similar to land plants and green algae, diatoms are capable of *de novo*  
129 synthesis of essential amino acids, including L-lysine via a predicted  
130 aminotransferase-dependent DAP pathway (Figure 1). Genomic reconstruction of  
131 pathways in diatoms suggests many amino acid biosynthetic genes are present in  
132 multiple copies and function within organelles, while a subset of biosynthetic genes is  
133 present as single copies (Bromke, 2013; Bowler et al., 2008).

134 Within the genome of the model diatom *Phaeodactylum tricorutum*, the  
135 predicted lysine biosynthesis genes exist as single copies, and the corresponding  
136 proteins of the last four steps of the pathway predicted to localize within the  
137 chloroplast via canonical ASAF-type motifs and N-terminal chloroplast targeting  
138 peptides (Kilian and Kroth, 2005; Apt et al., 2002). In this report, we describe the  
139 phylogenetic origins of lysine biosynthetic machinery in diatoms. In addition, we  
140 report subcellular localization and biochemical activity of the enzyme involved in the  
141 terminal step of lysine biosynthetic pathway in *P. tricorutum*, and reveal that the  
142 enzyme (Phatr3\_J21592, UNIPROT ID B7G3A2; *Pt*LYSA hereafter) is essential and  
143 harbors unexpected promiscuity in substrate utilization. In order to gain insight into  
144 this unique behavior, we determined the crystal structure of *Pt*LYSA, and defined the  
145 determinants responsible for substrate promiscuity in diatoms.

146

147

148

## 149 RESULTS

150

### 151 Phylogenetic Analysis

152 The DAP biosynthetic pathway in diatoms appears to be a hybrid of  
153 components from plants and bacteria potentially acquired via horizontal gene transfer  
154 (HGT), a process previously described in sequenced diatom genomes (Bowler,  
155 2008). For the five enzymes catalyzing the synthesis of L-lysine from L-aspartate 4-  
156 semialdehyde (Table 1), orthologs in sequenced genomes and transcriptomes were  
157 identified, aligned, and examined using a maximum likelihood analysis (Figure 2). In  
158 parallel, target peptide analyses were conducted to predict subcellular localization  
159 (Table 1). The gene *PtDAPA* (Phatr3\_J11151) encodes a putative dihydrodipicolinate  
160 synthase (DDPS) homolog in *P. tricornutum* and cannot be confidently localized  
161 based on target peptide analysis (Table 1). Our analyses reveal that *PtDAPA* has  
162 orthologs in other stramenopile genomes; however, the closest ancestors are in  
163 gammaproteobacteria (Figure 2A). For the three intermediate steps in the pathway,  
164 the diatom proteins (carried out by *PtDAPF*, *PtDAPL* and *PtDAPB*) also have  
165 orthologs in the stramenopiles, the closest ancestors of which are found in plant or  
166 cyanobacterial genomes (*DAPL* in Figure 2B, *DAPF* and *DAPB* in Supplemental  
167 Figure 1). Each of these proteins also contain putative N-terminal chloroplast  
168 targeting sequences (Gruber and Kroth, 2017; Apt et al., 2002).

169 The terminal step of the DAP pathway in *P. tricornutum* is predicated to be  
170 catalyzed by *PtLYSA* (Phatr3\_J21592), which has orthologs throughout the  
171 stramenopile lineage; however, our analyses strongly suggest that the stramenopile  
172 lineage acquired the gene through horizontal gene transfer from Bacteria, specifically  
173 the PVC (Planctomycete-Verruca-Chlamydia) supergroup (Figure 2C). The diatom  
174 sequences for the enzymes in the pathway form monophyletic clades in phylogenetic  
175 inferences, suggesting that these enzymes are conserved through the entire lineage.  
176 In addition, our analyses reveal that the long branch length of the diatom and  
177 *Bolidophyceae* *LYSA* clade is associated with the insertion of a highly conserved 9  
178 amino-acid segment into the active site loop of the predicted protein (Figure 2D). In  
179 this work we focused on experimentally validating the terminal step of this chimeric  
180 lysine biosynthetic pathway for the following reasons: **1)** bioinformatic annotations of  
181 the *P. tricornutum* genome suggest the presence of three putative organic acid  
182 decarboxylase genes (Bowler et al., 2008) however the *LYSA* enzymes in diatoms

183 has not been biochemically validated thus far, **2**) the presence of the chloroplast  
184 targeting sequence in the *PtLYSA* protein suggesting a similar localization of the  
185 pathway observed in plants, and **3**) inclusion of a highly conserved substitution in a  
186 critical substrate-binding residue and a unique insertion in the active site loop, while  
187 maintaining its ancestral link to bacteria in the PVC supergroup.

188

### 189 **Determination of *PtLYSA* Subcellular Localization**

190 The subcellular localization of *PtLYSA* in *P. tricornutum* was determined using  
191 transgenic and exconjugant diatoms expressing C-terminal fusions of *PtLYSA* with  
192 either YFP or mTurquoise2 (mT2). Transgenic diatoms expressing *PtLYSA*-YFP  
193 fusions driven by *pFCPB* promoter were generated by particle bombardment (Apt et  
194 al., 1996). Confocal microscopy showed that on occasion the YFP signal formed  
195 distinct punctate distributions within the chloroplast (Figure 3A), while in other  
196 transgenic strains the YFP signal was located throughout the chloroplast.  
197 Exconjugants expressing similar *PtLYSA*-mT2 protein fusions on stable episomes  
198 were also generated, which provides a more controlled heterologous expression  
199 platform (Karas et al., 2015). Confocal microscopy of *Phaeodactylum* expressing a  
200 C-terminal mT2-fused version of *PtLYSA* revealed a distinct regional overlap of the  
201 mT2 fluorescence with the autofluorescence of chlorophyll in the chloroplast (Figure  
202 3C). We observed that exconjugant cells with constitutive expression of *PtLYSA*-mT2  
203 showed signs of cell stress, grew poorly and adopted an ovoid morphology. We  
204 chose to employ the nitrate inducible pNR promoter (Chu et al., 2016; Poulsen and  
205 Korger, 2005) to repress *PtLYSA*-mT2 expression during conjugation and strain  
206 selection and inducing expression after colony isolation. Exconjugants were  
207 generated and selected using ammonium as the nitrogen source and upon induction  
208 of cultures with nitrate, the cell morphology of these cultures quickly changed from  
209 pennate to ovoid and the cells began aggregating. In comparison, cultures  
210 expressing a cytosolic version of mT2 had little to no ovoid cells and grew to a higher  
211 cell density.

212

### 213 ***PtLYSA* RNAi and CRISPR**

214 Reported transcriptomic analysis of the lysine pathway genes in *P. tricornutum*  
215 reveals the expression patterns of the associated genes are diel-regulated, with the  
216 aminotransferase *PtDAPL* showing the greatest change in expression over the

217 course of the day (Smith et al., 2016; Supplemental Figure 2). In order to determine if  
218 the putative *PtLYSA* protein is necessary for growth, we performed RNAi-driven gene  
219 knockdown, as well as TALEN and CRISPR-Cas9 gene mutagenesis experiments.  
220 For the RNAi-based gene knockdown, overlapping 250-bp and 400-bp intragenic  
221 fragments of *PtLYSA* were generated and cloned into a receiver vector as described  
222 (De Riso et al., 2008), with the exception that Gibson assembly (Gibson et al., 2008)  
223 was used instead of classical restriction enzyme dependent cloning. The receiver  
224 vector contains a transcriptional unit conferring phleomycin resistance and a cloning  
225 site with either the *pFCPB* or *pNR* upstream of the cognate terminator sequence. All  
226 attempts at attaining transformants of RNAi driven by *pFCPB* failed to yield colonies,  
227 despite the inclusion of a non-lethal positive control targeted to the *P. tricornutum*  
228 urease gene (Phatr3\_J29702) that yielded transformants. We were able to attain  
229 RNAi-expressing transgenic lines where the hairpin loop for *PtLYSA* is driven by *pNR*  
230 only if the transformation is plated with ammonia as a sole nitrogen source. These  
231 lines exhibit reduced growth rates and *PtLYSA* protein content (Supplemental Figure  
232 3) when grown on nitrate (RNAi-induced) instead of ammonia (RNAi-silenced).

233 Gene ablation vectors were made with the TALEN system described for *P.*  
234 *tricornutum* (Weyman et al., 2015); while colonies were obtained for the positive  
235 control urease knockout lines, none could be recovered for cell lines transformed with  
236 vectors targeting *PtLYSA*. Subsequent attempts were carried out using episome-  
237 delivered CRISPR-Cas9 methodology that includes multiplexed small-guide RNAs  
238 (sgRNAs, Moosburner et al., 2020). Two sgRNAs were delivered with Cas9 together  
239 or individually to *Phaeodactylum* using bacterial conjugation (Diner et al., 2016;  
240 Karas et al., 2015). The first attempt to knockout *PtLYSA* used a Cas9-fusion  
241 episome that harbors both sgRNAs, g21592-1 and g21592-2. Initially, two  
242 transformation attempts were made to produce transgenic *P. tricornutum* lines. Each  
243 time, less than 20 colonies were obtained on the plate, even after transformation  
244 optimization. On the third attempt, the selection plate growth media was  
245 supplemented with L-lysine (40  $\mu\text{g mL}^{-1}$ ), which produced over 100 colonies on the  
246 selection plates.

247 A total of 24 colonies from the third conjugation attempt were analyzed for  
248 Cas9-induced indels by Sanger sequencing and TIDE analysis. The expected  
249 mutagenesis genotype was an 18-bp deletion between the two sgRNA cleavage  
250 sites. Manual curation of the sequences did not produce any obvious knock-out



251 mutations but had a signature of Cas9 activity at the expected cut site(s). TIDE  
252 analysis revealed that 6 of 24 cell lines were heterozygous, or heterozygous where  
253 one allele contained an 18-bp deletion and the other allele retained a wild-type  
254 sequence (Figure 4). This observation was surprising since an 18-bp deletion should  
255 not knock-out the protein but could result in reduced enzyme activity or protein  
256 misfolding by removing 6 amino acids within the open-reading frame. Other attempts  
257 to produce a biallelic mutant cell line included re-streaking colonies to produce  
258 monoclonal cell lines and growing the heterozygous cell lines on increasing  
259 concentrations of L-lysine to force a biallelic mutation to occur. Nonetheless, the only  
260 genotype that could be produced using both sgRNAs to cut out an 18-bp sequence  
261 was heterozygous.

262 Subsequently, each sgRNA was delivered to *Phaeodactylum* individually and  
263 selected using growth media supplemented with L-lysine. 24 colonies were picked  
264 and analyzed for genotypes as described previously. Colonies that contained  
265 g21592-2 could not produce a transgenic genotype and were all wild-type at the  
266 *PtLYSA* locus. As for g21592-1, 2 of 24 colonies showed the effects of Cas9 activity  
267 after manual sequence curation and TIDE analysis. Since the induced mutations  
268 would be random indels, the colonies were re-streaked and monoclonal cell lines  
269 were picked again. Of 24 colonies, 18 had Cas9 activity at the g21592-1 cut site.  
270 TIDE analysis revealed that one third (8/24) of colonies were clearly heterozygous  
271 (Figure 4). Three colonies had the genotype of a 12-bp deletion plus wild-type and  
272 five colonies had the genotype of a 10-bp deletion plus wild-type. The other colonies  
273 had either a wild-type genotype (4), a mixed genotype without a wild-type signature  
274 (5), or a mix of indel and wild-type (2) (Supplemental Figure 4). In the 10-bp deletion  
275 plus wild-type heterozygous cell lines, a deletion of a 10-bp sequence would result in  
276 a deleterious frame-shift by introducing a premature stop codon in one of the two  
277 alleles. Therefore, one functional allele is sufficient to retain L-lysine biosynthesis in  
278 the chloroplast; however, using two sgRNAs, a biallelic mutant cell line of *PtLYSA*  
279 could not be obtained.

280

### 281 **Biochemical Analysis of *PtLYSA***

282 Primary sequence analysis indicated that *PtLYSA* is homologous to an organic  
283 acid decarboxylase, likely a DAPDC, a well-studied and structurally characterized  
284 enzyme family (Hu et al., 2008; Gokulan et al., 2003; Ray et al., 2002). The *P.*

285 *tricornutum* genome is predicted to harbor genes for putative DAP, ornithine and  
286 arginine decarboxylases (Smith et al., 2016; Bowler et al., 2008). To biochemically  
287 validate *PtLYSA* as a DAPDC, we cloned full-length and varying N-terminal deletion  
288 constructs into a pBAD-driven bacterial expression vector, fusing them with a C-  
289 terminal 6xHis-Flag affinity tag (Savitsky et al., 2010). To screen for expression and  
290 solubility at small scale, the resultant plasmids were transformed into *E. coli* BL21  
291 cells (Supplemental Figure 5). Overnight induction with 0.5% L-arabinose at 30 °C  
292 yielded several soluble constructs, with increased solubility at 18 °C. Judging by the  
293 level of expression and solubility, we chose to purify the  $\Delta 36$ -*PtLYSA*-F481L variant  
294 protein in large quantities using immobilized metal (Ni) affinity chromatography  
295 (IMAC) and tested the purified enzyme for *in vitro* activity towards multiple substrates  
296 including ornithine and all three DAP stereoisomers (Figure 5, Supplemental Figure  
297 6; Methods). The resolution of substrates and products of  $\Delta 36$ -*PtLYSA*-F481L was  
298 achieved through pre-column derivatization with 1-fluoro-2,4-dinitrophenyl-5-L-  
299 alanine amide (L-FDAA), known as Marfey's reagent (Bhushan and Brückner, 2004).

300 Derivatization of DAP and lysine with Marfey's reagent allows for  
301 chromatographic separation of stereoisomers followed by UV-detection (340 nm) and  
302 was used for reaction assay analysis by HPLC (Methods). We found that the purified  
303 *PtLYSA* enzyme produced L-lysine from *meso*-DAP and displayed no activity towards  
304 ornithine (Supplemental Figure 6), confirming biochemical function of *PtLYSA* as a  
305 DAPDC. When the purified  $\Delta 36$ -*PtLYSA*-F481L protein was challenged with three  
306 different DAP stereoisomers, to our surprise, we observed that the enzyme is  
307 capable of producing D-lysine from the D,D-DAP and L-lysine from L,L-DAP. Both the  
308 *meso*-DAP and D,D-DAP reactions go to completion; however, the L,L-DAP reaction  
309 has significant amount of unreacted substrate even after overnight incubation (Figure  
310 5).

311 *PtLYSA* was also subjected to differential scanning fluorimetry (DSF) against a  
312 pool of potential ligands (Figure 6). Purified *PtLYSA* exhibited a melting temperature  
313 ( $T_m$ ) of 49 °C ( $\pm 1$ ) and is stabilized by the potential ligands. The substrate *meso*-DAP  
314 increased thermal stability ( $\Delta T_m$ ) of *PtLYSA* by 4.8 °C ( $\pm 0.8$ ), indicating a potential  
315 interaction between *meso*-DAP and *PtLYSA*. Similarly, *PtLYSA* was stabilized by the  
316 product, L-lysine ( $\Delta T_m = 5.9$  °C ( $\pm 1$ )). DSF data revealed that the D,D-DAP isomer  
317 was able to stabilize *PtLYSA* by 5.8 °C ( $\pm 0.6$ ); however, L,L-DAP enhanced the

318 thermal stability by 1 °C ( $T_m = 50 \text{ °C} (\pm 0.2)$ ; Figure 6). These DSF experiments are  
319 consistent with the preferred utilization of *meso*-DAP and D,D-DAP as substrates,  
320 relative to L,L-DAP. These data are also consistent with the incomplete processing of  
321 L,L-DAP observed during *in vitro* assays (~50% turnover to L-lysine after overnight  
322 incubation, Figure 5), in contrast to using D,D-DAP and *meso*-DAP to yield D-lysine  
323 and L-lysine, respectively. In addition, D-lysine binds to *PtLYSA* and induces a similar  
324 thermal stability similar to L-amino acid (Figure 6), suggesting that the catalytic  
325 pocket of *PtLYSA* accommodates both enantiomeric forms of lysine.

326 The use of D,D-DAP as a substrate and the production of D-lysine is  
327 remarkable, as reported DAPDC orthologs, thus far, exhibit strong selectivity towards  
328 *meso*-DAP as substrate. Structural analyses reveals that amino acids sidechains in  
329 DAPDC active sites orient *meso*-DAP for catalysis and restrict D,D-DAP from  
330 engaging in a productive orientation with respect to the bound PLP cofactor  
331 necessary for decarboxylation reaction (Hu et al., 2008; Gokulan et al., 2003; Ray et  
332 al., 2002). In particular, a conserved arginine side chain in DAPDC orthologs appears  
333 to impose extensive steric hindrance to bar D,D-DAP; interestingly in diatoms the  
334 arginine side chain at this position is replaced by a threonine (T317 in *PtLYSA*).

335

### 336 **Crystal Structure of *PtLYSA***

337 On the basis of reported coordinates of DAPDC enzymes in the RCSB Protein  
338 Data Bank, a construct of *PtLYSA* encompassing amino acids 39-476, which lacks  
339 the N-terminal signal peptide, was purified and co-crystallized in the presence of D-  
340 lysine (Methods). The structure of *PtLYSA* was determined by molecular replacement  
341 using *E. coli* DAPDC (PDB: 1KNW) as a search model. The final model refined at  
342 2.78 Å resolution had  $R_{\text{cryst}}$  and  $R_{\text{free}}$  values of 0.18 and 0.23, respectively (Table 2).

343 Crystals contained two molecules of *PtLYSA* in the asymmetric unit  
344 (protomers 1 and 2; Figure 7A), suggesting a dimer. Size-exclusion chromatography  
345 is consistent with the proposed dimer (elution time corresponding to an apparent  
346 molecular weight of ~100 kDa; monomer molecular weight of ~50 kDa)  
347 (Supplemental Figure 7), suggesting the protein is a dimer in solution. The two  
348 protomers are arranged in a “head-to-tail” configuration related by 2-fold non-  
349 crystallographic symmetry. The interface is polar in nature and shows remarkable  
350 surface complementarity while burying a total of ~4120 Å<sup>2</sup> of solvent assessable  
351 surface area (Supplemental Figure 8) upon dimerization.

352

### 353 **Structure of *Pt*LYSA in relation to DAPDC orthologs**

354 Individual protomers of *Pt*LYSA consist of two domains: an N-terminal 8-fold  
355  $\alpha/\beta$  barrel and a C-terminal  $\beta$  sandwich domain (Figure 7A), with both domains  
356 contributing to the dimer interface. The barrel domain lacks the N-terminal  $\beta$  sheet  
357 extension of *C. glutamicum* (Son and Kim, 2018), *M. tuberculosis* (Weyand et al.,  
358 2009) and *M. jannaschii* (Ray et al., 2002) enzymes; however, the domain is  
359 topologically similar to *H. pylori* (Hu et al., 2008), *E. coli* (PDB: 1KNW) and *T.*  
360 *maritima* (PDB: 2YXX) DAPDC, which lack the N-terminal extension. The protomers  
361 of *Pt*LYSA are similar to these last three DAPDC orthologs with a root-mean-square  
362 deviation (RMSD) between 1.1 and 1.3 Å over 249 aligned C $\alpha$  atoms. Therefore, the  
363 structure unambiguously confirmed that *Pt*LYSA belongs to the group IV pyridoxal-5'-  
364 phosphate (PLP) dependent decarboxylase family (Kern et al., 1999; Sugio et al.,  
365 1995).

366 Structure-based sequence alignment of the DAPDC orthologs underscore two  
367 structurally divergent regions in *Pt*LYSA: **1**) the loop segment between  $\beta 6$  and  $\alpha 7$   
368 ( $\beta 6$ - $\alpha 7$  loop; amino acids 183-209), and **2**) the loop segment between  $\beta 7$  and  $\alpha 9$  ( $\beta 7$ -  
369  $\alpha 9$  loop henceforth; amino acids 238-245) (Supplemental Figure 9). In *Pt*LYSA, the  
370  $\beta 6$ - $\alpha 7$  loop has a 7 amino acid insertion, which could only be built completely as a  
371 random coil into the electron density of protomer 1 (Figures 7A and 7B). Akin to  
372 protomer 2 of *Pt*LYSA, this segment is not included in the structures of DAPDC from  
373 *Aquifex aeolicus* (PDB 2P3E) and *Brucella melitensis* (PDB 3VAB). In the structure of  
374 *H. pylori* DAPDC (PDB: 2QGH), the analogous segment has been annotated as  
375 'active site loop', which occludes the active site ligands from solvent (Hu et al., 2008).  
376 In *H. pylori* this region forms a  $3_{10}$  helix (Figure 7B). In *C. glutamicum* (PDB: 5X7M,  
377 Son and Kim, 2018) and *M. tuberculosis* (PDB: 2O0T, Weyand et al., 2009; PDB:  
378 1HKW, Gokulan et al., 2003), this segment forms a two stranded anti-parallel  $\beta$  sheet  
379 (Figure 7B). In *M. jannaschii* (PDB: 1TUF, Ray et al., 2002) and *T. maritima* (PDB:  
380 2YXX), this segment adopts a helical conformation; and in *E. coli* (PDB: 1KNW) it  
381 forms a similar, but smaller random coil compared to *Pt*LYSA segment (Figure 7B).

382 The  $\beta 7$ - $\alpha 9$  loop forms a wall of the active site in all DAPDCs (Figure 8), and  
383 the *Pt*LYSA enzymes has a 5 amino acid deletion in this segment (Supplemental  
384 Figure 9), which causes an expansion of the *Pt*LYSA active site (Figure 8) compared

385 to orthologs from *C. glutamicum*, *M. tuberculosis*, *M. jannaschii*, *H. pylori* and *T.*  
386 *maritima*. An analogous deletion has also been observed in the  $\beta$ 7- $\alpha$ 9 loop of *E. coli*  
387 DAPDC (Supplemental Figure 9), in which it adopts a conformation similar to that  
388 observed in *PtLYSA* (Figure 8).

389

### 390 **Architecture of the substrate binding site in *PtLYSA***

391 The structural analyses reveal that both protomers of the *PtLYSA* dimer  
392 contribute to the active site by reciprocally sharing 8 conserved amino acids: Lys95,  
393 His238, Glu314, Tyr430, Cys392, Glu393, Ser394, and Thr317. The Thr317 is unique  
394 to *PtLYSA* (Figure 7C, Supplemental Figure 9), as the corresponding residue in all  
395 structurally characterized DAPDCs is an arginine, which is part of the EPGR motif  
396 (Supplemental Figure 9) (Son and Kim, 2018, Weyand et al., 2009; Hu et al., 2008;  
397 Gokulan et al., 2003; Ray et al., 2002). While the sidechains of Lys95, His238,  
398 Tyr430 and Thr317 are supplied in *cis* to the active site of the protomers, the side  
399 chain of Cys392, Glu393 and Ser394, which form a conserved CESH/SD motif in  
400 DAPDC, are shared in *trans* from the other protomer (Figures 7C and 7D). In DAPDC  
401 orthologs, the conserved side chain at Lys73 from the Y/FAXKA motif (Supplemental  
402 Figure 9) forms a Schiff base with the cofactor, PLP, which exhibits aromatic stacking  
403 interaction with the side chain of His238. The side chains of Glu314 (OE) and Tyr430  
404 (OH) contact (H-bonds) the pyridine endocyclic nitrogen (N1) and phosphate (O1P)  
405 of the PLP, respectively.

406 In the active sites of the *PtLYSA* dimer, a sulfate ion occupies the position of  
407 the phosphate group of PLP (Figures 7C and 7D). Superimpositions of *PtLYSA*  
408 protomers with PLP-bound DAPDC structures reveal that the coordination sphere of  
409 the sulfate ion is very similar to that observed in the PLP-PO<sub>4</sub> interaction. However,  
410 there is a striking adaptation observed in the polyanion coordination in *PtLYSA*; the  
411 sidechain oxygen (OG1) of Thr317 (EPGR motif; Supplemental Figure 9) is engaged  
412 in a H-bond interaction with the SO<sub>4</sub> (Figures 7C and 7D). The arginine sidechains in  
413 DAPDC orthologs do not participate in such an interaction (Figure 8), instead they  
414 contribute to substrate specificity and stabilize the active site by interacting with a  
415 tyrosine sidechain OH via a H-bond. The tyrosine is conserved in DAPDC orthologs;  
416 however, it is replaced by an arginine, Arg278, in *PtLYSA*.

417 Additional, but weak, electron density features were observed adjacent to the  
418 SO<sub>4</sub> ion in the active sites of *PtLYSA*. The densities were fenced by Lys275, Arg278,

419 Arg358 and Tyr360, and interpreted and modeled as co-crystallized D-lysine for  
420 protomer 1 (Figure 7D). Given the weak density and modest 2.78 Å resolution of the  
421 refined coordinates, the assignment of D-lysine remains speculative. It is, however,  
422 notable that only Arg358 and Tyr360 are conserved among the DAPDC orthologs  
423 (Supplemental Figure 9).

424

425

## 426 **DISCUSSION**

427           Diatoms evolved via serial endosymbiotic events between a photosynthetic  
428 symbiont and a non-photosynthetic exobiont that have occurred over the past 1.8  
429 billion years (Armbrust et al., 2004). In addition to these processes, there have been  
430 substantial horizontal gene transfer events between diatoms and bacteria (Mock et  
431 al., 2017; Raymond et al., 2012; Bowler et al., 2008). The phylogenetic analyses  
432 reported within conclusively show the lysine biosynthetic pathway in diatoms is  
433 conserved across all species examined by genome or transcriptome sequencing to  
434 date. This conserved pathway includes genes likely derived from the symbiont in the  
435 primary endosymbiotic event (*DAPL*, *DAPB*, *DAPF*) as well as two genes (*DAPA*,  
436 *LYSA*) likely derived from cryptic horizontal gene transfers from Bacteria. *DAPA*  
437 appears to have originated from gammaproteobacteria in the *Vibrio* lineage, which is  
438 not a common Bacterial HGT partner for diatoms (Bowler, et al. 2009; Bowler et al.,  
439 2008). In contrast, the *LYSA* appears to have been transferred from the  
440 Verrucamicrobia lineage, which has been predicted to have contributed a substantial  
441 number of genes to modern diatom genomes (Bowler et al., 2008). The  
442 phylogenetically chimeric pathway is reminiscent of the urea cycle and overall  
443 nitrogen assimilation pathways within diatoms (Smith et al., 2019; Allen et al., 2011),  
444 both of which are composed of genes from different evolutionary partners of the  
445 serial endosymbiotic events. The conservation of this chimeric pathway across all  
446 diatoms sequenced to date suggests strong selective pressure for the retention of the  
447 pathway and that this event occurred early in the evolution of the diatom lineage.

448           Subsequent work focused on the terminal step of the pathway, which was  
449 hypothesized to be catalyzed by *PtLYSA*. Biochemical assays confirmed the purified  
450 protein converts *meso*-DAP to L-lysine. The observation that overexpression of FP-  
451 linked fusions of *PtLYSA* in *P. tricornutum* cells results in the co-localization of signal  
452 with chloroplast autofluorescence is consistent with the prediction that *PtLYSA*  
453 contains a canonical bipartite transit peptide harboring an ASAF cleavage site  
454 (Gruber and Kroth, 2017; Apt et al., 2002). This localization also corroborates  
455 previous reports that in plants lysine production is carried out in the chloroplast (Mills  
456 et al., 1980; Wallsgrave and Mazelis, 1980) and that the three genes upstream of  
457 *PtLYSA* (*DAPF*, *DAPL* and *DAPB*) encoding the terminal arm of the *P. tricornutum*  
458 lysine pathway also contain predicted N-terminal chloroplast targeting peptides  
459 (Table 1). The localization of these enzymes in the chloroplast has potential

460 biochemical and system-wide consequences. These steps of the pathways will be  
461 subject to large changes in redox state (Rosenwasser et al., 2014; Baier and Dietz,  
462 2005). Diurnal swings in chloroplast redox state may have significant implications for  
463 *DAPF*, where a dimerization is not only necessary for function but also sensitive to  
464 reversible disulfide-bond formation between protomers (Sagong and Kim, 2017). It is  
465 possible that redox-responsive disulfide bond disruption deactivates *DAPF* during the  
466 dark periods where the local chloroplast environment becomes more reducing,  
467 potentially halting the supply of *meso*-DAP. This potential post-translational effect is  
468 an additional level of regulation, superimposed upon that of diel gene expression of  
469 the entire lysine pathway, which is transcribed at higher levels during the light period  
470 in *P. tricornutum* (Smith et al., 2016) and may contribute to regulation of carbon flux  
471 and assimilation during the day/night cycle.

472 The dynamic regulation of the lysine biosynthetic pathway genes at the  
473 transcript level suggests an important role for this pathway in diatom metabolism.  
474 This notion is supported by the observed changes in the engineered gene expression  
475 during the course of this study. Overexpression of a heterologous copy of *PtLYSA*  
476 from an episome using a non-diel responsive promoter in a wild-type background  
477 induces a change in *P. tricornutum* cells from fusiform to ovoid morphotype, which is  
478 associated with cell stress (Lauritano et al., 2015). Controls show that this effect is  
479 not due to the expression of fluorescent tag. Similarly, homozygous gene knockouts  
480 were not attainable, with only heterozygous exconjugants being attained in media  
481 supplemented with exogenous L-lysine when Cas9 editing of *PtLYSA* was attempted.  
482 These data demonstrate a functional allele of *PtLYSA* is essential for growth. These  
483 heterozygous exconjugants contained alleles coding for a native copy of *PtLYSA* as  
484 well as a copy with a 6 amino-acid deletion that is predicted to have minimal effect on  
485 the tertiary structure of the homodimeric enzyme. Deletion analyses identified the  
486 LEEAA sequence segment (amino acids 72-76) in *PtLYSA* as essential  
487 (Supplemental Figure 9). This segment is not conserved among DAPDC orthologs,  
488 hence the basis for its essentiality was not immediately apparent. In the crystal  
489 structure, this segment forms a helix ( $\alpha 2$  in *PtLYSA*, Supplemental Figure 9), which is  
490 structurally conserved across the orthologs despite the lack of sequence similarity.  
491 The *PtLYSA* structure underscores that this segment plays a secondary but  
492 important role in catalysis by buttressing residues in and adjacent to the active site  
493 (Supplemental Figure 10). We surmise that analogous deletion in DAPDCs would



494 result in similar phenotypes in the orthologs. RNAi with constitutive promoters was  
495 also unsuccessful, though inducible RNAi successfully generated transgenic lines,  
496 which were used to verify that knockdown of *PtLYSA* expression has a detrimental  
497 effect on growth (Supplemental Figure 4). Overall, *PtLYSA* appears to be an  
498 essential gene in *P. tricornutum* and these results suggest that a diverse gene editing  
499 tool kit beyond just CRISPR-Cas guided gene knockouts is necessary to characterize  
500 *LYSA* and possibly other essential genes in diatoms.

501 The activity of *PtLYSA* towards both *meso*-DAP and *D,D*-DAP (Figure 5) was  
502 unexpected, and is consistent with DSF data showing that *PtLYSA* is able to bind  
503 both *meso*-DAP and/or *D,D*-DAP with similar  $\Delta T_m$ s (Figure 6). It should be noted that  
504 while the biochemical assay demonstrates that *PtLYSA* can use *L,L*-DAP as  
505 substrate, and the reaction does not proceed to completion under the conditions  
506 employed (Figure 5). Additionally, *L,L*-DAP did not impact the thermal stability of  
507 *PtLYSA* (Figure 6). Metabolomic studies in diatoms are in their infancy, therefore it is  
508 not known if diatoms produce *D,D*-DAP *in vivo*, or encounter it in its environment.  
509 Production of *D,D*-DAP *in vivo* would also be biochemically unprecedented, as *D,D*-  
510 DAP has never been demonstrated to be a physiological substrate for DAPDC  
511 enzymes, nor has it been demonstrated to be a potential product of DAPF epimerase  
512 activity in any organism (Hor et al., 2013). Therefore, the topic remains an open area  
513 of investigation. However, flexibility in substrate utilization may be advantageous  
514 under selective pressure, allowing organisms to take advantage of non-canonical  
515 substrates or cofactors encountered in the environment.

516 The structure of *PtLYSA* confirms that the protein forms a “head-to-tail”  
517 symmetric homodimer, and buries a large amount of solvent accessible surface area,  
518 including the active site (Supplemental Figure 8). The extensive dimer interface of  
519 *PtLYSA* along with the *cis-trans* orientation of the active site and its behavior in  
520 solution (Supplemental Figure 7) suggests that the protein is an obligate dimer,  
521 consistent with orthologs from diverse organisms (Son and Kim, 2018; Peverelli et  
522 al., 2016; Griffin, 2012 et al.; Weyand et al., 2009; Hu et al., 2008; Gokulan et al.,  
523 2003; Ray et al., 2002). In this aspect, *PtLYSA* is similar to members of the DAPDC  
524 superfamily; however, unique aspects of the structure also provide some insight as to  
525 the stereochemical origins of the stereopromiscuity. The active site of *PtLYSA*  
526 possesses three striking adaptations: 1) an insertion in the active site loop ( $\beta 7$ - $\alpha 9$

527 loop), **2**) a deletion in the  $\beta$ 7- $\alpha$ 9 loop, and **3**) presence of a unique Thr317 residue  
528 within the active site (Supplemental Figure 9). The active site loop insertion appears  
529 to afford additional conformational flexibility, which might impact substrate selectivity  
530 in *Pt*LYSA. Deletion in the  $\beta$ 7- $\alpha$ 9 loop expands the active site significantly  
531 (Supplemental Figure 9), and potentially removes steric hindrances, which could  
532 allow multiple stereoisomers to bind; the notion is consistent with the DSF analyses  
533 (Figure 6). A deletion in  $\beta$ 7- $\alpha$ 9 loop has also been observed in *E. coli* DAPDC  
534 (Supplemental Figure 9), which was shown to be able to bind D-lysine in the active  
535 site (PDB: 1KO0). Notwithstanding, the most remarkable adaptation in the active site  
536 of *Pt*LYSA is the replacement of the conserved arginine in the EPGR motif with a  
537 threonine (Supplemental Figure 9). Similar substitution at this residue are observed  
538 in all sequenced diatoms to date, as well as some bacterial (*Leptospira interrogans*),  
539 algal (*Ostreococcus lucimarinus*) and cryptophytes (*Guillardia theta*) lineages. The  
540 side chain of Thr317 coordinates a SO<sub>4</sub>, which occupies the position of PLP-PO<sub>4</sub>  
541 (Figures 7 and 8). The shorter sidechain of Thr317 may relax substrate specificity  
542 and structural constraints imposed by the arginine in structurally characterized  
543 DAPDC orthologs. Importantly, each of these three active site adaptations are not  
544 specific to *P. tricornutum* and are conserved across all putative diatom LYSA  
545 proteins.

546

547

## 548 **METHODS**

549

### 550 **Phylogenetic Analysis**

551 Sequences for the analysis were retrieved from NCBI-nr, PhyloDB, JGI, and  
552 MarDB (<https://mmp.sfb.uit.no/databases/maradb/>) using DIAMOND BLAST (Buchfink,  
553 2015). Outgroup (non-diatom) sequences were clustered on 50% identity and 80%  
554 coverage using MMseqs2 (Steinegger and Soding, 2017). Datasets were aligned by  
555 MAFFT v7.407 (Katoh and Standley 2013) using the L-INS-i refinement and a  
556 maximum of 1000 iterations and trimmed by trimAl v1.4 (Capella-Gutiérrez, 2009)  
557 allowing 70% sequences to have a gap (-gt 0.3). Maximum likelihood (ML) trees were  
558 inferred by IQ-TREE v 1.6.12 (Nguyen, 2015) using the LG+C20+F+G model and the  
559 posterior mean site frequency method (Wang, 2018), starting from a LG+F+G guide  
560 tree and employing the strategy of rapid bootstrapping followed by a “thorough” ML  
561 search with 1,000 ultra-fast bootstrap replicates.

562 To resolve the topology of LYSA with multiple long branches, the ML tree was  
563 compared with a Bayesian topology. The latter was inferred by PhyloBayes MPI v1.7  
564 (Lartillot, 2013) under the CAT-GTR model most robust against long-branch  
565 attraction artifacts in three independent chains run for ~40,000 generations when  
566 they reached convergence at 0.128 maximum discrepancy. Then, burn-in of 4,000  
567 generations (10 %) was discarded from each chain and a consensus tree was  
568 calculated from every-10<sup>th</sup>-tree subsamples.

569

### 570 **Plasmids for Gene Deletion Studies**

571 Vectors for inhibiting the expression of *PtLYSA* via RNAi were designed using  
572 previously described plasmids (Allen et al., 2011). The plasmid backbone was  
573 linearized via PCR using primers LYS-038/039. 250-bp and 400-bp targeting  
574 fragments were amplified from the *PtLYSA* gene using primers LYS-040/041 and  
575 LYS-041/042, respectively. Loop-hairpin overlaps targeting *PtLYSA* were assembled  
576 using Gibson cloning. The resulting vectors drive loop-hairpin expression using the  
577 relatively high expression promoter *pFCPB* coupled with the terminator *tFCPA*. In a  
578 subsequent build, this vector was linearized using primers that exclude the *pFCPB*  
579 element and then assembled with *pNR* using Gibson cloning.

580 Plasmids for TALEN were constructed as previously described (Weyman et  
581 al., 2015) and introduced via electroporation. Plasmids for *P. tricornutum* CRISPR

582 were built using Golden Gate-based assembly methods for CRISPR-Cas9 targeting  
583 vectors ([dx.doi.org/10.17504/protocols.io.4acgsaw](https://doi.org/10.17504/protocols.io.4acgsaw)).

584

### 585 **Plasmids for Localization**

586 *PtLYSA*-YFP fusion constructs were built with Gateway cloning method (Siaut  
587 et al., 2007). Plasmids for episomal overexpression of fusion proteins in *P.*  
588 *tricornutum* were based upon *PtPBR1* and contained an *oriT* to allow for conjugation  
589 of the plasmids from bacteria (Karas et al., 2015). The predicted promoter and  
590 terminator for *PtLYSA* were amplified from *Phaeodactylum* gDNA and correspond to  
591 the genomic coordinate chromosome 20(+):362797-363410 for the promoter and  
592 chromosome 20(+):366255-366898 for the terminator. The nitrogen-inducible pNR  
593 promoter and native tNR terminator were amplified from *Phaeodactylum* gDNA and  
594 correspond to the genomic coordinate chromosome 20(+):362797-363410 for the  
595 promoter and chromosome 20(+):366255-366898 for the terminator. The coding  
596 sequence for the mTurquoise2 reporter protein (Goedhart et al., 2012) was amplified  
597 from plasmid L1\_23 (Pollak et al., 2019) using primers LYS-09 and LYS-010  
598 (Supplemental Information) and contained overhangs to produce a C-terminal fusion  
599 protein when translated. Plasmids were built using the Gibson assembly method and  
600 validated by Sanger sequencing.

601

### 602 **Plasmids for Protein Expression, DSF and Crystallography**

603 The coding sequences of full-length, N-terminally  $\Delta 24$  and  $\Delta 36$  deletion  
604 constructs of *PtLYSA* were cloned from *P. tricornutum* genomic DNA using primers  
605 described in Table 1 (Supplemental Information) and Primestar polymerase (Takara)  
606 with primers LYS13-LYS16. These fragments were sub-cloned using Gibson  
607 assembly methods into XhoI-linearized PtpBAD-CTHF vector (Brunson et al., 2018).  
608 Sequence analysis after cloning (Eurofins) revealed that some  $\Delta 24$  and  $\Delta 36$  clones  
609 had obtained a point mutation at the junction between the terminal F481 and  
610 thrombin cleavage linker in the vector backbone, resulting in a F481L mutation.  
611 These constructs ( $\Delta 24$ -*PtLYSA*-F481L and  $\Delta 36$ -*PtLYSA*-F481L) were analyzed  
612 alongside their wild-type counterparts for their level of solubility and expression.

613 DSF and crystallization studies utilized a DNA segment encoding *PtLYSA*  
614 (amino acid residues 39-476) was inserted in frame into pNIC28 Bsa4 (pSGC-His)  
615 using ligation independent cloning (Gileadi et al., 2008); the gene is fused to a leader

616 sequence encoding an TEV-cleavable N-terminal His<sub>6</sub> tag. The inserted DNA  
617 sequence of the corresponding domain was sequenced (Genewiz) completely to  
618 exclude the acquisition of unwanted coding changes during DNA amplification and  
619 cloning. The resultant plasmid was transformed into *E. coli* BL21 (DE3) CodonPlus  
620 RIL (Novagen). For protein preparation, 2 L of bacterial culture (Super Broth,  
621 Teknova) supplemented with 50 µg ml<sup>-1</sup> kanamycin, 100 µg ml<sup>-1</sup> chloramphenicol and  
622 100 µL L<sup>-1</sup> antifoam 204 (Sigma), was grown at 37 °C in LEX 48 airlift bioreactors  
623 (Epiphyte3, Canada). After 7 hours of growth ( $A_{600}$  of 2), the temperature of the  
624 cultures was reduced to 20 °C for optimal protein folding, induced with addition of 0.5  
625 mM isopropyl-β-D-thiogalactoside (IPTG; GoldBio) and incubated overnight.

626

### 627 **Transformation of plasmid DNA into *P. tricornutum***

628 The fusion constructs and control plasmids were transferred into *P.*  
629 *tricornutum* cells using the multi-well conjugation method (Diner et al., 2016). Briefly,  
630 plasmids were transformed into EPI-300 *E. coli* cells (Lucigen) harboring the pTA-  
631 MOB conjugation helper plasmid (Strand et al., 2014). The bacterial strains were  
632 then isolated, amplified and mixed with diatom cells to allow for conjugation of  
633 plasmids according to published methods (Diner et al., 2016). Diatom exconjugants  
634 were selected on 1/2L1 1% agar medium supplemented with 20 µg mL<sup>-1</sup> phleomycin  
635 (Gold Biolabs) at a diel cycle of 14:10 at ~50 µE ms<sup>-1</sup> light intensity.

636

### 637 **Microscopy**

638 All confocal images were captured using a Leica TCS-SP5 confocal  
639 microscope (Leica Microsystems). mT2 was detected by excitation with a 458 nm  
640 laser and an emission range of 465-510 nm. Chlorophyll autofluorescence was also  
641 excited with a 458 nm laser and detected with an emission range of 680-712 nm.

642

### 643 **Small-scale expression of PtLYSA**

644 Clones from BL21 *E. coli* (New England Biolabs) transformation plates were picked  
645 and cultured overnight in 5 mL LB broth supplemented with 10 µg mL<sup>-1</sup> tetracycline at  
646 30 °C and 220 rpm shaking. On the day of testing, these cultures were used to seed  
647 10 mL cultures of Terrific Broth supplemented with 10 µg mL<sup>-1</sup> tetracycline at a 1:20  
648 dilution. The cultures were then incubated for 4 hours at 30 °C, at which time they  
649 were then moved to 18 °C for an additional 60 minutes to cool. L-arabinose was

650 added to the cultures to a final concentration of 0.5% and the cells allowed to  
651 incubate overnight at 18 °C. Cultures were pelleted the following day and evaluation  
652 of protein expression was carried out as described  
653 ([dx.doi.org/10.17504/protocols.io.bkhgkt3w](https://doi.org/10.17504/protocols.io.bkhgkt3w)). Eluates and insoluble fractions were  
654 analyzed via polyacrylamide electrophoresis and gels stained with Coomassie  
655 Brilliant Blue G-250 solution for visualization of proteins.

656

### 657 **Purification of P $\Delta$ LYSA for biochemical analysis**

658 For large-scale purification, 1 L of the  $\Delta$ 36-P $\Delta$ LYSA-F481L BL21 cell line was  
659 cultured and induced as described above. Cell pellets were sonicated in 500 mM  
660 NaCl, 20 mM Tris-HCl pH 8.0, 10% glycerol and purified using FPLC and a 5 mL  
661 HisTrap FF column. Large-scale protein purification from *E. coli* was performed on an  
662 ÄKTApurifier instrument (GE Healthcare) with the modules Box-900, UPC-900, R-  
663 900 and Frac-900 with all solvents filtered through a nylon membrane 0.2  $\mu$ m GDWP  
664 (Merck) prior to use. Final eluates were pooled and resuspended in 20 mM HEPES  
665 pH 8.0, 300 mM KCl, and 10% glycerol. Concentration was determined by method of  
666 Bradford.

667

### 668 **Decarboxylation Assay**

669 Enzyme assays for HPLC analysis were conducted in 50 mM HEPES pH 8,  
670 200 mM KCl, and 10% glycerol, at 100  $\mu$ L scale. Substrates (DAP, ornithine and  
671 arginine) were added at 1 mM concentration and cofactor PLP was added at 50  $\mu$ M  
672 concentration. Assays were started with the addition of  $\sim$ 50  $\mu$ M P $\Delta$ LYSA protein and  
673 allowed to incubate overnight (12-18 hours), after which reactions were quenched  
674 upon addition of assay components for Marfey's derivatization.

675

### 676 **Marfey's derivatization and RP-HPLC analysis**

677 Marfey's derivatization was carried out by the addition of 20  $\mu$ L concentrated  
678 Na<sub>2</sub>CO<sub>3</sub> (approx. 10% w/v) and 100  $\mu$ L of freshly prepared 1% w/v 1-fluoro-2,4-  
679 dinitrophenyl-5-L-alanine amide (L-FDAA) in acetone to 50  $\mu$ L of the P $\Delta$ LYSA  
680 reactions described above. For the generation of standards and H<sub>2</sub>O blanks, 50  $\mu$ L of  
681 1 mM aqueous amino acid stock solutions or Milli-Q H<sub>2</sub>O was added in place of the  
682 P $\Delta$ LYSA reaction mix. Marfey's derivatization reactions were allowed to incubate for  
683 90 minutes at 37 °C before quenching with 25  $\mu$ L 1N HCl and adding 5  $\mu$ L Milli-Q

684 H<sub>2</sub>O to bring the total volume to 200  $\mu$ L. Reactions were centrifuged (18,000 x g, 10  
685 min) and 10  $\mu$ L of the clarified supernatant was injected for analytical reverse-phase  
686 HPLC (Agilent Technologies 1200 series, Phenomenex Luna 5u C18(2), 4.6 x 150  
687 mm) at a flow rate of 1 mL min<sup>-1</sup> using the following method: 5% B (5 min), 5 – 95% B  
688 (20 min), 95 – 5% B (1 min), 5% B (4 min), where A = 0.1% aqueous trifluoroacetic  
689 acid, and B = 0.1% trifluoroacetic acid in acetonitrile (Brunson et al., 2018). Reaction  
690 products were monitored by UV-detection at 340 nm.

691

### 692 **Protein purification of *PtLYSA* for DSF and Crystallization**

693 Cells were harvested by centrifugation at 6,500 x g and suspended in buffer  
694 containing 20 mM HEPES (pH 7.5), 500 mM NaCl, 20 mM imidazole, 0.1% IGEPAL,  
695 20% sucrose, 1 mM  $\beta$ -mercaptoethanol ( $\beta$ ME). Cells were disrupted by sonication  
696 and cell-debris was removed by centrifugation at 45,000 x g. The supernatants were  
697 applied to a chromatography column packed with 5 ml His60 superflow resin  
698 (Clontech) that had been equilibrated with buffer A (20 mM HEPES pH 7.5, 20 mM  
699 imidazole, 500 mM NaCl, 1 mM  $\beta$ ME). The column was washed with buffer A and the  
700 His<sub>6</sub> tagged *PtLYSA* was eluted with buffer B (20 mM HEPES pH 7.5, 350 mM NaCl,  
701 250 mM imidazole, 1 mM  $\beta$ ME). The N-terminal His<sub>6</sub> tags from the protein was  
702 removed by overnight digestion at 4 °C with the TEV protease at a 1000:1 (w/w) ratio  
703 of *PtLYSA*:TEV. The tag-free protein was then separated from the His<sub>6</sub> tag and TEV  
704 protease by a Superdex 200 (16/60) size exclusion chromatography column  
705 equilibrated with buffer containing 20 mM HEPES pH 7.5, 150 mM NaCl, and 5 mM  
706 DTT. Potential peak fractions containing *PtLYSA* were assessed by SDS-PAGE,  
707 pooled concentrated to 30 mg ml<sup>-1</sup> using a 30 kDa Amicon Ultra-15 centrifugal filter  
708 device (Millipore). For crystallization experiments, the tag-free protein was purified  
709 using a Superdex 200 (16/60) gel filtration column in a buffer containing 20 mM Na-  
710 Acetate pH 5.5, 350 mM NaCl, and 1 mM  $\beta$ ME. Fractions containing the peak of the  
711 protein were pooled and concentrated to 20 mg/ml and buffer exchanged to Na-  
712 Acetate (pH 5.5), 150 mM NaCl, and 10 mM DTT using a 30 kDa Amicon Ultra-15  
713 centrifugal filter device (Millipore). Purified *PtLYSA* appeared to be bright yellow,  
714 suggesting the presence of co-purified cofactor, PLP from *E. coli* host.

715

### 716 **Differential Scanning Fluorimetry**

717 Potential ligands (10 mM) stocks were prepared in H<sub>2</sub>O and stored at -20 °C,  
718 and diluted to 1 mM working stock in buffer containing 20 mM HEPES, pH 7.5, 150  
719 mM NaCl and 5 mM DTT (DSF buffer). Final DSF reaction mixtures (20 µl final  
720 volume) contained 100 µM *PtLYSA*, 500 mM each ligand, and 5× SYPRO Orange  
721 (Invitrogen) in DSF buffer and were distributed in a 384-well PCR plate (Applied  
722 Biosystems) with 5 control wells (purified *PtLYSA*) and 5 wells with *PtLYSA*-ligand  
723 complexes indicated in Figure 6. The fluorescence intensities were measured using  
724 an Applied Biosystems 7900HT fast real-time PCR system with excitation at 490 nm  
725 and emission at 530 nm. The samples were heated from 25 to 99 °C at a rate of 3 °C  
726 min<sup>-1</sup>. The midpoint of the unfolding transition ( $T_m$ ) was obtained from fitting the  
727 melting curve to a Boltzmann equation (Niesen et al., 2007).  $\Delta T_m$  for each specific  
728 ligand was calculated as the difference of the  $T_m$  values measured with or without a  
729 ligand (average of 5 measurements).

730

### 731 **Protein crystallization and crystal harvesting**

732 Initial crystallization screening of *PtLYSA* was performed using 800 nl  
733 (protein:mother liquor=1:1) sitting drops at a concentration of 12 mg/ml (255 µM) co-  
734 crystallized with D-lysine (1 mM) with a Crystal Gryphon (Art Robbins Instruments)  
735 and utilizing MCSG sparse matrix crystallization suite (Microlytic). Crystals were  
736 eventually obtained in sitting drops by vapor diffusion against well solutions  
737 containing 2.0 M Ammonium sulfate and 0.1 M Bis-Tris pH 6.5. Crystals appeared  
738 after 12 days at 19 °C and reached maximum dimensions of 15 × 30 × 30 µm<sup>3</sup> in  
739 another week. For data collection, crystals were cryo-preserved by addition of 30%  
740 glycerol to the mother liquor prior to flash-cooling in liquid nitrogen.

741

### 742 **Data collection and processing, structure determination, model building,** 743 **refinement and analysis**

744 Data were collected with an Eiger 9M detector, with a wavelength of 0.98 Å,  
745 on the ID-17-1 (AMX) beamline at the National Synchrotron Light Source-II,  
746 Brookhaven National Laboratory (Table 2). Data from a single crystal were integrated  
747 and scaled using AIMLESS (Winn et al., 2011). Diffraction was consistent with the  
748 orthorhombic space group P2<sub>1</sub>2<sub>1</sub>2<sub>1</sub> (a=85.8, b= 86.3, c=127.2 Å) and extended to a  
749 resolution of 2.78 Å, with two molecules in the asymmetric unit (protomer 1/chain A  
750 and 2/chain B). Initial phases were determined by molecular replacement with



751 PHASER (McCoy et al., 2007) using refined coordinates of the *E. coli* DAPDC (PDB:  
752 1KNW, Seq ID 27%) as the search model. After determining the phases an atomic  
753 model was built into the density using the automated model building program  
754 BUCCANEER (Cowtan, 2006) and manually inspected using COOT (Emsley and  
755 Cowtan, 2004). The model was refined with REFMAC5 (CCP4, 1994) and PHENIX  
756 (Liebschner et al., 2019). For structural interpretation of *PtLYSA* protomer 1 has been  
757 used. Analyses of the structures were performed in COOT and MOLPROBITY (Chen  
758 et al., 2010). Crystallographic statistics and RCSB accession codes are provided in  
759 Table 2.

760

### 761 **Accession Numbers**

762 This study did not generate new genomic data. Accession numbers for genes  
763 described in this work include *P. tricornutum* *LYSA*, J21592; *DAPA*, J11151; *DAPB*,  
764 J4025; *DAPL*, J22909; *DAPF*, J34852.

765

766

### 767 **Supplemental Data**

768

769 **Supplemental Figure 1.** Phylogenetic analysis of the putative diatom lysine  
770 biosynthesis pathway components.

771

772 **Supplemental Figure 2.** Diel expression of lysine pathway genes from Table 1 from  
773 transcriptomic analysis.

774

775 **Supplemental Figure 3.** Reduction of *PtLYSA* protein content in *P. tricornutum* cells  
776 via RNAi results in a lag in growth rate.

777

778 **Supplemental Figure 4.** Sanger sequencing of CRISPR *P. tricornutum*  
779 exconjugants.

780

781 **Supplemental Figure 5.** Small-scale solubility testing of *PtLYSA*-CTHF constructs in  
782 *E. coli* BL21 cells.

783

784 **Supplemental Figure 6.** *PtLYSA* does not act upon L-ornithine.

785

786 **Supplemental Figure 7.** Structure based primary sequence analyses.

787

788 **Supplemental Figure 8.** Dimer interface of *PtLYSA*.

789

790 **Supplemental Figure 9.** The LEEAA segment of *PtLYSA* maintains integrity of the  
791 active site.

792

### 793 **ACKNOWLEDGEMENTS**

794 This research is supported by the *Department of Energy*, Office of Biological and  
795 Environmental Research (*BER*), grant DE-SC0018344.

796

### 797 **AUTHOR CONTRIBUTIONS**

798 V.A.B., J.K.B., A.G., M.A.M., S.M.K.K., and C.L.D. designed research. V.A.B., J.K.B.,  
799 A.G., M.A.M., E.A.G., Z.F., J.B., S.M.K.K., and C.L.D. performed research. V.A.B.,  
800 J.K.B., A.G., M.A.M., E.A.G., and C.L.D. contributed new reagents/analytic tools.  
801 V.A.B., J.K.B., A.G., M.A.M., Z.F., S.M.K.K., B.S.M., A.E.A., S.C.A., and C.L.D.  
802 analyzed data. V.A.B., J.K.B., A.G., M.A.M., S.C.A., and C.L.D. wrote the article.

803

804



805

806

807 **Figure 1.** Lysine biosynthetic pathway in *P. tricornutum* based on predicted gene  
 808 functions from the genome (Table 1).

809

810 Entry of aspartate metabolites into the DAP pathway begins with addition of pyruvate  
 811 to A-4-S via *DAPA* to produce 4-hydroxy-tetrahydrodipicolinate (HTPA), followed by  
 812 *DAPB*-mediated reduction to THDPA (2,3,4,5-tetrahydrodipicolinate). DAP  
 813 aminotransferase (*DAPL*) converts THDPA to L,L-diaminopimelate (L,L-DAP). L,L-DAP  
 814 is subsequently isomerized to *meso*-DAP by *DAPF* epimerization activity, with lysine  
 815 produced from *meso*-DAP via decarboxylation by *LYSA*

816

817

818

819

820



)LJXUHK\ORJHQHWLF DQDO\VLV RI WKH SXWDSLDWKZGLDWRP  
 ,Q VFKHPDWLF WUHHV \$ & ERRWVWUUDSDVQSKRQJWSRLQWKRZQ  
 \$ 0/ SK\ORJHQ\ RI GLK\GURGLDAPFRDQDQWM DQGWKDFHHQ DOJDD  
 ZHOO DV UHG DOJDH DUH GLVWDQWO\ [UDIDJWHHGLQVFRJKRPRJ  
 VWUDPHQRSLOHV DQG GLDWRPV 7KH WRSRORJHULDXQJRVWLVG  
 RI WKH GAPWZLPWK D SRVVLEOXanthronidalesRQVKLS WR

%0/ SK\ORJHQ\ RI GLDPLQRSPLMSADVHKLGHFDRRWDURP JUHH  
 DOJDH H[FOXGLQJ ODQG SODQWV DQG FRPSWRISKDJHDBQGR  
 VWUDPHQRSLOH FODGHV FOOpitulaVerulamdroidDQVHIVRRUDQ  
 7KLV WRSRORJ\ ZDV FRQVLVWHQW ZLWKS%UDWHVKBQZQ, QFBUH  
 EUDQFKHV GW ± GLIIHUHQW WRSRORJHV\$OYRHSQYRDXMGRG  
 KLVWRU\ RI WKLV HQJ\PH FDQ EH LQIHKHNGWKBRW WKHOPDQV  
 GHILQHG FURZQ JURXSV RI FUISWRSKI\WPHQKSLSWRSKXWHH V  
 DFWLYH VLWH ORRS LQVolidophyceaeLGLD SWRPLFDGR WKH

& 0/ SK\ORJHQGRDPLQRSPLPHODWH DAPLQRKHJGQVWHUDEXHLRQ  
 DapL IROORZV D SDWWHUQ FRQVLRWWFHQRPPRQWK  
 DQFHVWRU /(&\$ IROORZHG E\ HQGRVQFEHLR MURPHUGIGDWDGGR  
 WR VWUDPHQRSLOHV DQG KDSWRSKI\WHV

' &RQVHUYHG FKDUDFWHU RI WKH GLDWRP WLSMIFLDRR\$QVKH  
 ELWVFRUH SORW VXPPDULJHV WKH FRQVZLWYKHG KUDHVDLFGXKHU/LR  
 WZR LQYDULDQW SKHQ\ODODQLQHV DQGDGLGWULQWEKWRZHKKIG  
 7KH ORJRSORW LV EDVHG RQ DQ DOLJSPHFQVHRVHTXHLQVHRP D  
 \$PLQR DFLG QXPEHULQJ PwicoDrifurUGLTXHWRRHWKQHG WKH JUH\  
 PDUNV WKH IODQNLQJ UHJLRQ FRQVHUYHGSUBBWRVGV E<6\$ K  
 :HEORJR &URRNV HW DO



852  
853  
854  
855  
856  
857  
858  
859  
860  
861  
862  
863  
864  
865  
866  
867

**Figure 3.** *In vivo* localization of C-terminal FP-tagged *PtLYSA* constructs in *P. tricornutum*.

**(A)** Z-stacked confocal microscopy image of *PtLYSA*-YFP. Yellow, YFP signal; Red; Chlorophyll autofluorescence.

**(B)** Confocal microscopy of *PtLYSA*-mT2, chlorophyll autofluorescence channel.

**(C)** Confocal microscopy of *PtLYSA*-mT2, mTurquoise2 channel.

**(D)** Confocal microscopy of *PtLYSA*-mT2, bright field channel.

**(E)** Merge of B,C,D



868  
869  
870  
871  
872  
873  
874  
875  
876  
877  
878  
879  
880  
881

**Figure 4.** TIDE sequencing analysis results for heterozygous *P. tricornutum* *PtLYSA* mutants produced using two sgRNAs (gLysA-1 and gLysA-2).

**(A-C)** Heterozygous mutation of an 18-bp deletion paired with a wild-type sequence for three cell lines.

**(D)** TIDE result for a wild-type sequence of *PtLYSA*.



882  
883

884 **Figure 5.** RP-HPLC ( $\lambda = 340$  nm) analyses of L-FDAA (Marfey's) derivatized *PtLYSA*  
885 reactions with *meso*-, L,L-, and D,D-DAP, and comparison to similarly derivatized  
886 lysine and DAP standards.

887

888

889 Substrates for enzyme reactions were added at 1 mM concentration and similarly 1  
890 mM of each standard was used for subsequent derivatization. Overnight *PtLYSA*  
891 reactions of *meso*-DAP and D,D-DAP produced L- and D-lysine, respectively. L,L-DAP  
892 reactions also produced L-lysine, but did not proceed to completion.

892



893  
 894  
 895  
 896  
 897  
 898  
 899  
 900  
 901  
 902

**Figure 6.** Differential scanning fluorimetry of *PtLYSA* in presence of potential ligands.

**(A)** Denaturation of *PtLYSA* as a function of temperature as observed by increase in fluorescence of the indicator dye SYPRO Orange, which binds nonspecifically to hydrophobic surfaces. At higher temperatures, the intrinsic fluorescence degrades due to the formation of protein aggregates and dye dissociation.

**(B)** Schematic description of ligands and their calculated  $\Delta T_m$  values are shown.





**Figure 7.** Structure of *PtLYSA* highlighting the active site.

(A) View of the *PtLYSA* dimer shown in ribbon representation with secondary structure elements indicated by arrows ( $\beta$  strands) and ribbons (helices). The two protomers are colored in light-blue (protomer 1; chain A) and light-pink (protomer 2; chain B). A transparent molecular surface envelops the structure. The sulfate ions that occupies the active sites of the protomers are shown in stick representation and labeled. The ordered active site loop in protomer 1 is colored in green. N and C denote the location of the N and C termini.

(B) Closeup view of the part of the active site in protomer 1 highlighting the bound  $\text{SO}_4$  and the active site loop (color coded as in A). Relative locations and structural elements of active site loops in *C. glutamicum* (PDB: 5X7M, in grey), *M. tuberculosis* (PDB: 2O0T, in pink), *E. coli* (PDB: 1KNW, in dark-blue), *T. maritima* (PDB: 2YXX, in gold), *H. pylori* (PDB: 2QGH, in cyan) and *M. jannaschii* (PDB: 1TUF, in magenta) DAPDC orthologs by aligning the respective coordinates on protomer 1. PLP (transparent spheres) was modeled into the protomer 1 based on its position in the *T. maritima* structure to denote the potential location and orientation of the co-factor in the *PtLYSA* active site.

925 **(C)** Closeup view and interactions of the SO<sub>4</sub> in the active site in *PtLYSA*.  
926 Contributing sidechains to the active site form the protomers (color coded as A) are  
927 shown in sticks and labeled. Contacts to SO<sub>4</sub> are shown as dashed lines. Modeled  
928 PLP is shown in grey lines and transparent spheres.

929  
930 **(D)** Closeup view of the active site in *PtLYSA* showing electron density from omit  
931 maps (contoured at 1.2σ; light-blue mesh) around the SO<sub>4</sub> and putative D-lysine  
932 (stick representation, in green). Atomic contacts in *PtLYSA* sidechains with SO<sub>4</sub> are  
933 indicated by dashed lines. Potential sidechain contacts to D-lysine in the active site  
934 are shown stick representation. All figures depicting structure were generated with  
935 PyMol (DeLano et al., 2002).

936  
937



938  
 939  
 940  
 941  
 942  
 943  
 944  
 945  
 946  
 947  
 948  
 949  
 950  
 951  
 952  
 953  
 954  
 955

**Figure 8.** Distinctive active site in PtLYSA.

The conserved arginine in DAPDC orthologs is replaced by a threonine, Thr317, (indicated in stick representation and color coded as in Figure 6) in *PtLYSA*. SO<sub>4</sub> in the active site is shown in stick representation. The connecting loop between the stand  $\beta$ 7 and helix  $\alpha$ 9 (amino acid 236-244), which forms a wall of the active site, is smaller in comparison to the orthologs with exception of *E. coli* DAPDC (see Figure S8). The smaller sidechain of Thr317 together with the smaller  $\beta$ 7- $\alpha$ 9 connective loop adopting a distinct conformation (indicated by an arrow) compared to its counterpart create a distinctive and larger *PtLYSA* active site (indicated by a transparent sphere) that can potentially accommodate unique substrate (D,D-DAP) for catalysis and can be exploited as specific druggable packet. Part of the active site loops in the orthologous DAPDC are shown and color coded as in Figure 6 and labeled. Modeled PLP from *T. maritima* (PDB: 2XYY) is shown in grey lines.

956  
957  
958  
959  
960  
961  
962  
963  
964  
965  
966  
967  
968  
969  
970  
971  
972  
973  
974  
975  
976  
977  
978  
979  
980  
981  
982  
983  
984  
985  
986  
987  
988  
989

A



B



**Figure S1.** Phylogenetic analysis of the putative diatom lysine biosynthesis pathway components.

**(A)** ML phylogeny of dihydrodipicolinate reductase *DapB*. With moderate support, plants and green algae are more related to complex algae, including diatoms. The *DapB* homolog in this clade is likely related to delta-proteobacteria or Fibrobacterales (note the long branch of the latter group). In this schematic, bootstrap support is shown for critical branching points of the outgroups, while >85 branch support is shown in the Bolidophyceae-diatom clade.

**(B)** ML phylogeny of diaminopimelate epimerase *DapF*. This enzyme is apparently derived from cyanobacteria and in plants and green algae, red algae, stramenopiles and haptophytes constitutes a monophyletic clade, with red algae being moderately supported as the donor of the complex algal homolog. *Paulinella* are rhizarian algae that established a primary endosymbiotic relationship with a cyanobacterium independently on other algal lineages, as apparent from the figure. In this schematic,

1006 bootstrap support is shown for critical branching points of the outgroups, while >85  
1007 branch support is shown in the Bolidophyceae-diatom clade.  
1008



1009  
 1010  
 1011  
 1012  
 1013  
 1014  
 1015  
 1016  
 1017

**Figure S2.** Diel expression of *P. tricornutum* lysine pathway genes from Table 1 from transcriptomic analysis.

The black bar above represents the dark portion of the day. Adapted from Smith et al., 2016.



1034  
1035  
1036  
1037  
1038  
1039  
1040  
1041  
1042  
1043  
1044  
1045  
1046

**Figure S3.** Reduction of *PtLYSA* protein content in *P. tricornutum* cells via RNAi results in a lag in growth rate.

**(A)** Western blot of *PtLYSA* protein in uninduced RNAI conditions (NH4-repressed) comparing wild-type (WT) versus transgenic cell line (P2-7)

**(B)** Western blot of *PtLYSA* protein in induced RNAI conditions (NO3-active) comparing wild-type (WT) versus transgenic cell line (P2-7)

**(C)** RNAI-induced vs -uninduced growth curve of P2-7 cell line in duplicate. X-axis, time in days; Y-axis, chlorophyll content of batch cultures measured via fluorimetry



1047  
1048  
1049  
1050  
1051  
1052  
1053

**Figure S4.** Sanger sequencing of CRISPR *P. tricornutum* exconjugants.

Green arrows in schematic at top represent the targeted sites within *PtLYSA* gene and red bar represents expected 18-bp deletion upon editing with two sgRNAs.





1054  
 1055  
 1056  
 1057  
 1058  
 1059  
 1060  
 1061  
 1062  
 1063  
 1064

**Figure S5.** Small-scale solubility testing of *PtLYSA*-CTHF constructs in *E. coli* BL21 cells.

Protein expression was induced with 0.5% L-arabinose in Terrific Broth at 30 °C for 16 hours. The arrow indicates the  $\Delta 36$ -*PtLYSA*-F481L-CTHF construct employed for biochemical analyses. In, clarified input; E, eluate; FL, full-length protein; EV, empty vector control.



1065  
 1066  
 1067  
 1068  
 1069  
 1070  
 1071  
 1072  
 1073  
 1074

**Figure S6.** *PtLYSA* does not act upon L-ornithine.

RP-HPLC ( $\lambda = 340$  nm) analyses of L-FDAA (Marfey's) derivatized *PtLYSA* reactions with L-ornithine and comparison to similarly derivatized ornithine (time ~21.5 min) and putrescine (time ~23.2 min) standards. Substrates for enzyme reactions were added at 1 mM concentration and similarly 1 mM of each standard was used for subsequent derivatization.



1075  
1076  
1077  
1078  
1079  
1080  
1081  
1082  
1083  
1084  
1085  
1086  
1087  
1088  
1089  
1090  
1091

**Figure S7.** Structure based primary sequence analyses.

Aligned amino acid sequences for PtLYSA and DAPDC from *C. glutamicum* (PDB: 5X7M), *M. tuberculosis* (PDB: 2O0T), *E. coli* (PDB: 1KNW), *T. maritima* (PDB: 2YXX), *H. pylori* (PDB: 2QGH) and *M. jannaschii* (PDB: 1TUF). PtLYSA secondary structure elements (helices as cylinders; strands as arrows) are color coded as in Figure 6 above the sequence. Alignment gaps indicated by (-). Sidechain identity/similarity is denoted by red shading (conserved in all) or red letter (conserved in most). Conserved lysine that forms Schiff's base with PLP highlighted in green shade. Light-blue and light-pink asterisks above the alignment indicate conserved active site residues supplied in *cis* and *trans*, respectively. Green asterisks above denote PtLYSA residues adjacent to putative D-lysine. Three key binding motifs are indicated below the alignment.



1092  
 1093  
 1094  
 1095  
 1096  
 1097  
 1098  
 1099  
 1100

**Figure S8.** Dimer interface of *PtLYSA*.

Structure of *PtLYSA* is shown in surface representation and the protomers are color coded as in Figure 6. The interface was mapped using 1.4 Å probe radius and colored in yellow. Position of the active site loop in protomer 1 is indicated by arrows and labeled.



1101  
 1102  
 1103  
 1104  
 1105  
 1106  
 1107  
 1108  
 1109  
 1110  
 1111  
 1112  
 1113  
 1114  
 1115  
 1116

**Figure S9.** The LEEAA segment of *PtLYSA* maintains integrity of the active site.

A view of the interactions between the LEEAA (part of helix a6; aa 72-76) and the segment that demarcates the active site in protomer 1 (chain A; color coded as in Figure 6). Stick models of the amino acids that comprise the interface and the active site are shown; the bound  $\text{SO}_4$  and water in the active site are shown in stick representation and red sphere, respectively. Part of PLP (transparent spheres and lines) was modeled into the active site based on its position in the *C. glutamicum* structure (PDB: 5X7M) to denote the potential location and orientation of the co-factor in *PtLYSA*. Potential hydrogen bonds and van der Waals interactions are represented as black and red dashed lines, respectively. The interaction of the LEEAA segment at the interface highlights its potential role in maintaining active site integrity.

| <b>Pt Gene ID</b> | <b>Function</b>                                       | <b>EC ID</b> | <b>Ancestor</b>        | <b>Localization</b> |
|-------------------|-------------------------------------------------------|--------------|------------------------|---------------------|
| Phatr3_J11151     | <i>DAPA</i> , 4-hydroxytetrahydropicolinate synthase  | 4.3.3.7      | <i>Vibrio</i>          | Unclear             |
| Phatr3_J4025      | <i>DAPB</i> , 4-hydroxytetrahydropicolinate reductase | 1.17.1.8     | Plant                  | Chloroplast         |
| Phatr3_J22909     | <i>DAPL</i> , L,L-diaminopimelate aminotransferase    | 2.6.1.83     | Plant                  | Chloroplast         |
| Phatr3_J34582     | <i>DAPF</i> , diaminopimelate epimerase               | 5.1.1.7      | Plant                  | Chloroplast         |
| Phatr3_J21592     | <i>LYSA</i> , diaminopimelate decarboxylase           | 4.1.1.20     | <i>Verrucamicrobia</i> | Chloroplast         |

1117  
1118  
1119  
1120  
1121  
1122  
1123  
1124  
1125  
1126  
1127

**Table 1.** *P. tricornutum* lysine biosynthetic pathway protein IDs, phylogenetic outgroup, and predicted subcellular localization.

1128

| <b>Gene ID</b>                           | <b>PHATRRAFT_21592</b>                        |
|------------------------------------------|-----------------------------------------------|
| Co-Crystallized Ligand                   | D-lysine                                      |
| <b>Data Collection*</b>                  |                                               |
| Source                                   | BNL ID-17-1                                   |
| Wavelength (Å)                           | 0.98                                          |
| Number of crystals                       | 1                                             |
| Space group                              | P2 <sub>1</sub> 2 <sub>1</sub> 2 <sub>1</sub> |
| Cell dimensions                          |                                               |
| a,b,c (Å)                                | 85.8 86.3 127.2                               |
| Resolution (Å)                           | 19-2.78 (2.88-2.78)                           |
| Completeness (%)                         | 99.4 (98.6)                                   |
| Total reflections                        | 329040                                        |
| Unique reflections                       | 24274                                         |
| Wilson B-factor                          | 29.9                                          |
| Multiplicity                             | 13.6 (13.4)                                   |
| R <sub>merge</sub> (%)                   | 25.7 (85.63)                                  |
| CC <sub>1/2</sub> (%)                    | 99.1 (86.1)                                   |
| CC* (%)                                  | 99.8 (96.2)                                   |
| <l>/s(l)                                 | 10.2 (3.0)                                    |
| <b>Refinement*</b>                       |                                               |
| Reflections: work/free                   | 24270 (2349)/1304 (131)                       |
| R <sub>work</sub> /R <sub>free</sub> (%) | 19.8 (26.2)/24.4 (30.1)                       |
| Number of TLS groups                     | 14                                            |
| Number of atoms                          |                                               |
| Protein                                  | 6479                                          |
| Ligand                                   | 35                                            |
| Water                                    | 49                                            |
| Average B-factors (Å <sup>2</sup> )      |                                               |
| Protein                                  | 23.4                                          |
| Ligand                                   | 34.32                                         |
| Water                                    | 19.5                                          |
| r.m.s.d.                                 |                                               |
| Bond lengths (Å)                         | 0.003                                         |
| Bond angles (°)                          | 0.6                                           |
| Molprobity †                             |                                               |
| Favored                                  | 98.3% (652 aa)                                |
| Allowed                                  | 100% (867 aa)                                 |
| Outliers                                 | none                                          |
| Clash score                              | 99 <sup>th</sup> percentile                   |
| Molprobity score                         | 98 <sup>th</sup> percentile                   |
| <b>PDB ID Code</b>                       | <b>7JPJ</b>                                   |

1129

1130 \*Statistics calculated using PHENIX (Adam et al., 2010); highest resolution shells indicated in  
 1131 parentheses

1132 †Calculated with the program MolProbity (Chen et al., 2010)

1133

1134 **Table 2.** Crystallographic data collection and refinement statistics

1135

1136



1137 **CITATIONS**

1138

1139 Allen, A. E., C. L. Dupont, M. Oborník, A. Horák, A. Nunes-Nesi, J. P. McCrow, H.  
1140 Zheng, D. A. Johnson, H. Hu, A. R. Fernie and C. Bowler (2011). Evolution and  
1141 metabolic significance of the urea cycle in photosynthetic diatoms. Nature 473: 203.

1142

1143 Apt, K. E., A. R. Grossman and P. G. Kroth-Pancic (1996). Stable nuclear  
1144 transformation of the diatom *Phaeodactylum tricornutum*. Molecular and General  
1145 Genetics MGG 252(5): 572-579.

1146

1147 Apt, K. E., L. Zaslavkaia, J. C. Lippmeier, M. Lang, O. Kilian, R. Wetherbee, A. R.  
1148 Grossman and P. G. Kroth (2002). *In vivo* characterization of diatom multipartite  
1149 plastid targeting signals. Journal of Cell Science 115(21): 4061-4069.

1150

1151 Armbrust, E. V., J. A. Berges, C. Bowler, B. R. Green, D. Martinez, N. H. Putnam, et  
1152 al. (2004). The Genome of the Diatom *Thalassiosira Pseudonana*: Ecology,  
1153 Evolution, and Metabolism. Science 306(5693): 79.

1154

1155 Armbrust, E. V. (2009). The life of diatoms in the world's oceans. Nature 459(7244):  
1156 185-192.

1157

1158 Asada, Y., K. Tanizawa, S. Sawada, T. Suzuki, H. Misono and K. Soda (1981).  
1159 Stereochemistry of meso-alpha,epsilon-diaminopimelate decarboxylase reaction: the  
1160 first evidence for pyridoxal 5'-phosphate dependent decarboxylation with inversion of  
1161 configuration. Biochemistry 20(24): 6881-6886.

1162

1163 Baier, M. and K.-J. Dietz (2005). Chloroplasts as source and target of cellular redox  
1164 regulation: a discussion on chloroplast redox signals in the context of plant  
1165 physiology. Journal of Experimental Botany 56(416): 1449-1462.

1166

1167 Bhushan, R. and H. Brückner (2004). Marfey's reagent for chiral amino acid analysis:  
1168 A review. Amino Acids 27(3): 231-247.

1169

1170 Bowler, C., A. E. Allen, J. H. Badger, J. Grimwood, K. Jabbari, A. Kuo, et al. (2008).  
1171 The *Phaeodactylum* genome reveals the evolutionary history of diatom genomes.  
1172 Nature 456: 239.  
1173  
1174 Bowler, C., A. Vardi and A. E. Allen (2009). "Oceanographic and Biogeochemical  
1175 Insights from Diatom Genomes." Annual Review of Marine Science 2(1): 333-365.  
1176  
1177 Bromke, M. A. (2013). Amino Acid biosynthesis pathways in diatoms. Metabolites  
1178 3(2): 294-311.  
1179  
1180 Brunson, J. K., S. M. K. McKinnie, J. R. Chekan, J. P. McCrow, Z. D. Miles, E. M.  
1181 Bertrand, V. A. Bielinski, H. Luhavaya, M. Oborník, G. J. Smith, D. A. Hutchins, A. E.  
1182 Allen and B. S. Moore (2018). Biosynthesis of the neurotoxin domoic acid in a bloom-  
1183 forming diatom. Science 361(6409): 1356-1358.  
1184  
1185 Buchfink, B., C. Xie and D. H. Huson (2015). Fast and sensitive protein alignment  
1186 using DIAMOND. Nature Methods 12(1): 59-60.  
1187  
1188 Bukhari, A. I. and A. L. Taylor (1971). Genetic Analysis of Diaminopimelic Acid- and  
1189 Lysine-Requiring Mutants of *Escherichia coli*. Journal of Bacteriology 105(3): 844-  
1190 854.  
1191  
1192 Capella-Gutiérrez, S., Silla-Martínez, J. M., & Gabaldón, T. (2009). trimAl: a tool for  
1193 automated alignment trimming in large-scale phylogenetic analyses. Bioinformatics  
1194 (Oxford, England), 25(15), 1972–1973. <https://doi.org/10.1093/bioinformatics/btp348>  
1195  
1196 Chang, Y.-F. (1978). Lysine metabolism in the rat brain: the pipercolic acid-forming  
1197 pathway. Journal of Neurochemistry 30(2): 347-354.  
1198  
1199 CCP4 (1994). The CCP4 suite: programs for protein crystallography. Acta Crystallogr  
1200 D Biol Crystallogr 50: 760-763.  
1201  
1202 Chen, V.B., Arendall, W.B., 3rd, Headd, J.J., Keedy, D.A., Immormino, R.M., Kapral,  
1203 G.J., Murray, L.W., Richardson, J.S., and Richardson, D.C. (2010). MolProbity: all-

1204 atom structure validation for macromolecular crystallography. Acta Crystallogr D Biol  
1205 Crystallogr 66: 12-21.

1206

1207 Chu, L., D. Ewe, C. Rio Bartulos, P. G. Kroth and A. Gruber (2016). Rapid induction  
1208 of GFP expression by the nitrate reductase promoter in the diatom *Phaeodactylum*  
1209 *tricornutum*. PeerJ 4: e2344.

1210

1211 Cowtan, K. (2006). The Buccaneer software for automated model building. 1. Tracing  
1212 protein chains. Acta Crystallogr D Biol Crystallogr 62: 1002-1011.

1213

1214 Crooks, G. E., Hon, G., Chandonia, J. M., & Brenner, S. E. (2004). WebLogo: a  
1215 sequence logo generator. Genome Research, 14(6), 1188–1190.  
1216 <https://doi.org/10.1101/gr.849004>

1217

1218 Crowther, J. M., Cross, P. J., Oliver, M. R., Leeman, M. M., Bartl, A. J.,  
1219 Weatherhead, A. W., North, R. A., Donovan, K. A., Griffin, M., Suzuki, H., Hudson, A.  
1220 O., Kasanmascheff, M., & Dobson, R. (2019). Structure-function analyses of two  
1221 plant *meso*-diaminopimelate decarboxylase isoforms reveal that active-site gating  
1222 provides stereochemical control. The Journal of Biological Chemistry, 294(21), 8505–  
1223 8515. <https://doi.org/10.1074/jbc.RA118.006825>

1224

1225 De Lencastre, H., Wu, S.W., Pinho, M.G., Ludovice, A.M., Filipe, S., Gardete, S.,  
1226 Sobral, R., Gill, S., Chung, M., and Tomasz, A. (1999). Antibiotic resistance as a  
1227 stress response: complete sequencing of a large number of chromosomal loci in  
1228 *Staphylococcus aureus* strain COL that impact on the expression of resistance to  
1229 methicillin. Microb Drug Resist 5:163-175.

1230

1231 De Riso, V., Raniello, R., Maumus, F., Rogato, A., Bowler, C., & Falciatore, A.  
1232 (2009). Gene silencing in the marine diatom *Phaeodactylum tricornutum*. Nucleic  
1233 Acids Research, 37(14), e96. <https://doi.org/10.1093/nar/gkp448>

1234

1235 DeLano, W.L. (2002). The PyMOL Molecular Graphics System. DeLano Scientific;  
1236 San Carlos, CA

1237

1238 Dewey, D. L., & Work, E. (1952). Diaminopimelic acid decarboxylase. Nature,  
1239 169(4300), 533–534. <https://doi.org/10.1038/169533a0>  
1240

1241 Diner, R. E., V. A. Bielinski, C. L. Dupont, A. E. Allen and P. D. Weyman (2016).  
1242 Refinement of the Diatom Episome Maintenance Sequence and Improvement of  
1243 Conjugation-Based DNA Delivery Methods. Frontiers in bioengineering and  
1244 biotechnology 4: 65-65.  
1245

1246 Emsley, P., and Cowtan, K. (2004). Coot: model-building tools for molecular  
1247 graphics. Acta Crystallogr D Biol Crystallogr 60: 2126-2132.  
1248

1249 Gibson, D. G., G. A. Benders, K. C. Axelrod, J. Zaveri, M. A. Algire, M. Moodie, M. G.  
1250 Montague, J. C. Venter, H. O. Smith and C. A. Hutchison (2008). One-step assembly  
1251 in yeast of 25 overlapping DNA fragments to form a complete synthetic *Mycoplasma*  
1252 *genitalium* genome. Proceedings of the National Academy of Sciences  
1253 105(51):20404.  
1254

1255 Gileadi, O., Burgess-Brown, N.A., Colebrook, S.M., Berridge, G., Savitsky, P., Smees,  
1256 C.E., Loppnau, P., Johansson, C., Salah, E., and Pantic, N.H. (2008). High  
1257 throughput production of recombinant human proteins for crystallography. Methods  
1258 Mol Biol 426; 221-246.  
1259

1260 Goedhart, J., D. von Stetten, M. Noirclerc-Savoye, M. Lelimosin, L. Joosen, M. A.  
1261 Hink, L. van Weeren, T. W. J. Gadella and A. Royant (2012). Structure-guided  
1262 evolution of cyan fluorescent proteins towards a quantum yield of 93%. Nature  
1263 Communications 3(1): 751.  
1264

1265 Gokulan, K., B. Rupp, M. S. Pavelka, W. R. Jacobs and J. C. Sacchettini (2003).  
1266 Crystal Structure of *Mycobacterium tuberculosis* Diaminopimelate Decarboxylase, an  
1267 Essential Enzyme in Bacterial Lysine Biosynthesis. Journal of Biological Chemistry  
1268 278(20): 18588-18596  
1269

1270 Griffin, M. D., J. M. Billakanti, A. Wason, S. Keller, H. D. Mertens, S. C. Atkinson, R.  
1271 C. Dobson, M. A. Perugini, J. A. Gerrard and F. G. Pearce (2012). Characterisation

1272 of the first enzymes committed to lysine biosynthesis in *Arabidopsis thaliana*. PLoS  
1273 One 7(7): e40318.  
1274  
1275 Gruber, A. and P. G. Kroth (2017). Intracellular metabolic pathway distribution in  
1276 diatoms and tools for genome-enabled experimental diatom research. Philos Trans R  
1277 Soc Lond B Biol Sci 372(1728).  
1278  
1279 Guillou, L., M.-J. Chrétiennot-Dinet, L. K. Medlin, H. Claustre, S. L.-d. Goër and D.  
1280 Vaultot (1999). Bolidomonas: A new genus with two species belonging to a new algal  
1281 class, the Bolidophyceae (Heterokonta). Journal of Phycology 35(2): 368-381.  
1282  
1283 Hor, L., M. G. Peverelli, M. A. Perugini and C. A. Hutton (2013). A new robust kinetic  
1284 assay for DAP epimerase activity. Biochimie 95(10): 1949-1953.  
1285  
1286 Hu, T., D. Wu, J. Chen, J. Ding, H. Jiang and X. Shen (2008). The Catalytic  
1287 Intermediate Stabilized by a “Down” Active Site Loop for Diaminopimelate  
1288 Decarboxylase from *Helicobacter pylori*: enzymatic characterization with crystal  
1289 structure analysis. Journal of Biological Chemistry 283(30): 21284-21293  
1290  
1291 Hudson, A. O., C. Bless, P. Macedo, S. P. Chatterjee, B. K. Singh, C. Gilvarg and T.  
1292 Leustek (2005). Biosynthesis of lysine in plants: evidence for a variant of the known  
1293 bacterial pathways. Biochim Biophys Acta 1721(1-3): 27-36.  
1294  
1295 Hudson, A. O., B. K. Singh, T. Leustek and C. Gilvarg (2006). An LL-diaminopimelate  
1296 aminotransferase defines a novel variant of the lysine biosynthesis pathway in plants.  
1297 Plant Physiol 140(1): 292-301.  
1298  
1299 Hutton, C. A., M. A. Perugini and J. A. Gerrard (2007). Inhibition of lysine  
1300 biosynthesis: an evolving antibiotic strategy. Molecular BioSystems 3(7): 458-465.  
1301  
1302 Jander G, and Joshji, V. Aspartate-derived Amino Acid Biosynthesis in  
1303 *Arabidopsis thaliana*. The Arabidopsis Book. 2009;e0121(10.1199/tab.0121):15.  
1304

1305 Karas, B. J., R. E. Diner, S. C. Lefebvre, J. McQuaid, A. P. R. Phillips, C. M.  
1306 Noddings, J. K. Brunson, R. E. Valas, T. J. Deerinck, J. Jablanovic, J. T. F. Gillard, K.  
1307 Beerli, M. H. Ellisman, J. I. Glass, C. A. Hutchison Iii, H. O. Smith, J. C. Venter, A. E.  
1308 Allen, C. L. Dupont and P. D. Weyman (2015). Designer diatom episomes delivered  
1309 by bacterial conjugation. Nature Communications 6: 6925.  
1310  
1311 Katoh, K. and D. M. Standley (2013). MAFFT Multiple Sequence Alignment Software  
1312 Version 7: Improvements in Performance and Usability. Molecular Biology and  
1313 Evolution 30(4): 772-780.  
1314  
1315 Kelland, J. G., M. M. Palcic, M. A. Pickard and J. C. Vederas (1985). Stereochemistry  
1316 of lysine formation by meso-diaminopimelate decarboxylase from wheat germ: use of  
1317 proton-carbon-13 NMR shift correlation to detect stereospecific deuterium labeling.  
1318 Biochemistry 24(13): 3263-3267.  
1319  
1320 Kern, A. D., M. A. Oliveira, P. Coffino and M. L. Hackert (1999). Structure of  
1321 mammalian ornithine decarboxylase at 1.6A resolution: stereochemical implications  
1322 of PLP-dependent amino acid decarboxylases. Structure 7(5): 567-581.  
1323  
1324 Kidron, H., S. Repo, M. S. Johnson and T. A. Salminen (2006). Functional  
1325 Classification of Amino Acid Decarboxylases from the Alanine Racemase Structural  
1326 Family by Phylogenetic Studies. Molecular Biology and Evolution 24(1): 79-89.  
1327  
1328 Kilian, O. and P. G. Kroth (2005). Identification and characterization of a new  
1329 conserved motif within the presequence of proteins targeted into complex diatom  
1330 plastids. Plant J 41(2): 175-183.  
1331  
1332 Kirma, M., W. L. Araújo, A. R. Fernie and G. Galili (2012). The multifaceted role of  
1333 aspartate-family amino acids in plant metabolism. Journal of Experimental Botany  
1334 63(14): 4995-5001.  
1335  
1336 Knorr, S., M. Sinn, D. Galetskiy, R. M. Williams, C. Wang, N. Müller, O. Mayans, D.  
1337 Schleheck and J. S. Hartig (2018). Widespread bacterial lysine degradation

1338 proceeding via glutarate and L-2-hydroxyglutarate. Nature Communications 9(1):  
1339 5071.  
1340  
1341 Kosuge, T. and T. Hoshino (1998). Lysine is synthesized through the  $\alpha$ -aminoadipate  
1342 pathway in *Thermus thermophilus*. FEMS Microbiology Letters 169(2): 361-367.  
1343  
1344 Lartillot, N., Rodrigue, N., Stubbs, D., & Richer, J. (2013). PhyloBayes MPI:  
1345 phylogenetic reconstruction with infinite mixtures of profiles in a parallel environment.  
1346 Systematic Biology 62(4), 611–615. <https://doi.org/10.1093/sysbio/syt022>  
1347  
1348 Lauritano, C., I. Orefice, G. Procaccini, G. Romano and A. Ianora (2015). Key genes  
1349 as stress indicators in the ubiquitous diatom *Skeletonema marinoi*. BMC Genomics  
1350 16(1): 411-411.  
1351  
1352 Liebschner, D., Afonine, P.V., Baker, M.L., Bunkoczi, G., Chen, V.B., Croll, T.I.,  
1353 Hintze, B., Hung, L.W., Jain, S., McCoy, A.J., et al. (2019). Macromolecular structure  
1354 determination using X-rays, neutrons and electrons: recent developments in Phenix.  
1355 Acta Crystallogr D Struct Biol 75, 861-877.  
1356  
1357 McCoy, A. J., N. E. Adams, A. O. Hudson, C. Gilvarg, T. Leustek and A. T. Maurelli  
1358 (2006). L,L-diaminopimelate aminotransferase, a trans-kingdom enzyme shared by  
1359 *Chlamydia* and plants for synthesis of diaminopimelate/lysine. Proceedings of the  
1360 National Academy of Sciences 103(47): 17909-17914.  
1361  
1362 McCoy, A.J., Grosse-Kunstleve, R.W., Adams, P.D., Winn, M.D., Storoni, L.C., and  
1363 Read, R.J. (2007). Phaser crystallographic software. J Appl Crystallogr 40: 658-674.  
1364  
1365 Mills, W. R., P. J. Lea and B. J. Mifflin (1980). Photosynthetic Formation of the  
1366 Aspartate Family of Amino Acids in Isolated Chloroplasts. Plant Physiology 65(6):  
1367 1166-1172.  
1368  
1369 Mock, T., R. P. Otilar, J. Strauss, M. McMullan, P. Paajanen, J. Schmutz, et al.  
1370 (2017). Evolutionary genomics of the cold-adapted diatom *Fragilariopsis cylindrus*.  
1371 Nature 541(7638): 536-540.

1372  
1373 Moosburner, M. A., P. Gholami, J. K. McCarthy, M. Tan, V. A. Bielinski and A. E.  
1374 Allen (2020). Multiplexed Knockouts in the Model Diatom *Phaeodactylum* by  
1375 Episomal Delivery of a Selectable Cas9. Frontiers in Microbiology 11: 5.  
1376  
1377 Nguyen, L.-T., H. A. Schmidt, A. von Haeseler and B. Q. Minh (2014). IQ-TREE: A  
1378 Fast and Effective Stochastic Algorithm for Estimating Maximum-Likelihood  
1379 Phylogenies. Molecular Biology and Evolution 32(1): 268-274.  
1380  
1381 Niesen, F.H., Berglund, H., and Vedadi, M. (2007). The use of differential scanning  
1382 fluorimetry to detect ligand interactions that promote protein stability. Nat Protoc 2:  
1383 2212-2221.  
1384  
1385 Perl, A., O. Shaul and G. Galili (1992). Regulation of lysine synthesis in transgenic  
1386 potato plants expressing a bacterial dihydrodipicolinate synthase in their chloroplasts.  
1387 Plant Molecular Biology 19(5): 815-823.  
1388  
1389 Peverelli, M. G. and M. A. Perugini (2015). An optimized coupled assay for  
1390 quantifying diaminopimelate decarboxylase activity. Biochimie 115: 78-85.  
1391  
1392 Peverelli, M. G., T. P. Soares da Costa, N. Kirby and M. A. Perugini (2016).  
1393 Dimerization of Bacterial Diaminopimelate Decarboxylase Is Essential for Catalysis.  
1394 Journal of Biological Chemistry 291(18): 9785-9795.  
1395  
1396 Pollak, B., A. Cerda, M. Delmans, S. Álamos, T. Moyano, A. West, R. A. Gutiérrez,  
1397 N. J. Patron, F. Federici and J. Haseloff (2019). Loop assembly: a simple and open  
1398 system for recursive fabrication of DNA circuits. New Phytologist 222(1): 628-640.  
1399  
1400 Poulsen, N. and N. Kröger (2005). A new molecular tool for transgenic diatoms. The  
1401 FEBS Journal 272(13): 3413-3423.  
1402  
1403 Pratelli, R. and G. Pilot (2014). Regulation of amino acid metabolic enzymes and  
1404 transporters in plants. Journal of Experimental Botany 65(19): 5535-5556.  
1405



1406 Price, M. N., G. M. Zane, J. V. Kuehl, R. A. Melnyk, J. D. Wall, A. M. Deutschbauer  
1407 and A. P. Arkin (2018). Filling gaps in bacterial amino acid biosynthesis pathways  
1408 with high-throughput genetics. PLOS Genetics 14(1): e1007147.  
1409

1410 Ray, S. S., J. B. Bonanno, K. R. Rajashankar, M. G. Pinho, G. He, H. De Lencastre,  
1411 A. Tomasz and S. K. Burley (2002). Cocystal Structures of Diaminopimelate  
1412 Decarboxylase: Mechanism, Evolution, and Inhibition of an Antibiotic Resistance  
1413 Accessory Factor. Structure 10(11): 1499-1508.  
1414

1415 Raymond, J. A. and H. J. Kim (2012). Possible role of horizontal gene transfer in the  
1416 colonization of sea ice by algae. PLoS one 7(5): e35968-e35968.  
1417

1418 Reyes-Prieto, A. and A. Moustafa (2012). Plastid-localized amino acid biosynthetic  
1419 pathways of Plantae are predominantly composed of non-cyanobacterial enzymes.  
1420 Sci Rep 2: 955.  
1421

1422 Rosenwasser, S., S. Graff van Creveld, D. Schatz, S. Malitsky, O. Tzfadia, A.  
1423 Aharoni, Y. Levin, A. Gabashvili, E. Feldmesser and A. Vardi (2014). Mapping the  
1424 diatom redox-sensitive proteome provides insight into response to nitrogen stress in  
1425 the marine environment. Proc Natl Acad Sci U S A 111(7): 2740-2745.  
1426

1427 Sagong, H. Y. and K. J. Kim (2017). Structural basis for redox sensitivity in  
1428 *Corynebacterium glutamicum* diaminopimelate epimerase: an enzyme involved in l-  
1429 lysine biosynthesis. Sci Rep 7: 42318.  
1430

1431 Savitsky, P., J. Bray, C. D. O. Cooper, B. D. Marsden, P. Mahajan, N. A. Burgess-  
1432 Brown and O. Gileadi (2010). High-throughput production of human proteins for  
1433 crystallization: The SGC experience. Journal of Structural Biology 172(1): 3-13.  
1434

1435 Siaux, M., M. Heijde, M. Mangogna, A. Montsant, S. Coesel, A. Allen, A.  
1436 Manfredonia, A. Falciatore and C. Bowler (2007). Molecular toolbox for studying  
1437 diatom biology in *Phaeodactylum tricorutum*. Gene 406(1): 23-35.  
1438

1439 Smith, S. R., J. T. Gillard, A. B. Kustka, J. P. McCrow, J. H. Badger, H. Zheng, A. M.  
1440 New, C. L. Dupont, T. Obata, A. R. Fernie and A. E. Allen (2016). Transcriptional  
1441 Orchestration of the Global Cellular Response of a Model Pennate Diatom to Diel  
1442 Light Cycling under Iron Limitation. PLoS Genet 12(12): e1006490.  
1443  
1444 Smith, S. R., C. L. Dupont, J. K. McCarthy, J. T. Broddrick, M. Oborník, A. Horák, Z.  
1445 Füßy, J. Cihlář, S. Kleessen, H. Zheng, J. P. McCrow, K. K. Hixson, W. L. Araújo, A.  
1446 Nunes-Nesi, A. Fernie, Z. Nikoloski, B. O. Palsson and A. E. Allen (2019). Evolution  
1447 and regulation of nitrogen flux through compartmentalized metabolic networks in a  
1448 marine diatom. Nature Communications 10(1): 4552.  
1449  
1450 Son, H. F. and K.-J. Kim (2018). Structural basis for substrate specificity of meso-  
1451 diaminopimelic acid decarboxylase from *Corynebacterium glutamicum*. Biochemical  
1452 and Biophysical Research Communications 495(2): 1815-1821.  
1453  
1454 Steinegger, M. and J. Söding (2017). MMseqs2 enables sensitive protein sequence  
1455 searching for the analysis of massive data sets. Nature Biotechnology 35(11): 1026-  
1456 1028.  
1457  
1458 Strand, T. A., R. Lale, K. F. Degnes, M. Lando and S. Valla (2014). A New and  
1459 Improved Host-Independent Plasmid System for RK2-Based Conjugal Transfer.  
1460 PLOS ONE 9(3): e90372.  
1461  
1462 Sugio, S., G. A. Petsko, J. M. Manning, K. Soda and D. Ringe (1995). Crystal  
1463 Structure of a D-Amino Acid Aminotransferase: How the Protein Controls  
1464 Stereoselectivity. Biochemistry 34(30): 9661-9669.  
1465  
1466 Velasco, A. M., J. I. Leguina and A. Lazcano (2002). Molecular Evolution of the  
1467 Lysine Biosynthetic Pathways. Journal of Molecular Evolution 55(4): 445-449.  
1468  
1469 Wallsgrove, R. M. and M. Mazelis (1980). The enzymology of lysine biosynthesis in  
1470 higher plants: Complete localization of the regulatory enzyme dihydrodipicolinate  
1471 synthase in the chloroplasts of spinach leaves. FEBS Letters 116(2): 189-192.  
1472

1473 Wang, H.-C., B. Q. Minh, E. Susko and A. J. Roger (2017). Modeling Site  
1474 Heterogeneity with Posterior Mean Site Frequency Profiles Accelerates Accurate  
1475 Phylogenomic Estimation. Systematic Biology 67(2): 216-235.  
1476  
1477 Weyand, S., Kefala, G., Svergun, D.I., and Weiss, M.S. (2009). The three-  
1478 dimensional structure of diaminopimelate decarboxylase from *Mycobacterium*  
1479 *tuberculosis* reveals a tetrameric enzyme organisation. J Struct Funct Genomics 10:  
1480 209-217.  
1481  
1482 Weyman, P. D., K. Beerli, S. C. Lefebvre, J. Rivera, J. K. McCarthy, A. L. Heuberger,  
1483 G. Peers, A. E. Allen and C. L. Dupont (2015). Inactivation of *Phaeodactylum*  
1484 *tricornutum* urease gene using transcription activator-like effector nuclease-based  
1485 targeted mutagenesis. Plant Biotechnology Journal 13(4): 460-470.  
1486  
1487 White, P. J. and B. Kelly (1965). Purification and properties of diaminopimelate  
1488 decarboxylase from *Escherichia coli*. The Biochemical Journal 96(1): 75-84.  
1489  
1490 Winn, M.D., Ballard, C.C., Cowtan, K.D., Dodson, E.J., Emsley, P., Evans, P.R.,  
1491 Keegan, R.M., Krissinel, E.B., Leslie, A.G., McCoy, A., *et al.* (2011). Overview of the  
1492 CCP4 suite and current developments. Acta Crystallogr D Biol Crystallogr 67: 235-  
1493 242.  
1494  
1495 Xu, H., B. Andi, J. Qian, A. H. West and P. F. Cook (2006). The  $\alpha$ -amino adipate  
1496 pathway for lysine biosynthesis in fungi. Cell Biochemistry and Biophysics 46(1): 43-  
1497 64.  
1498  
1499 Zhu, X. and G. Galili (2004). Lysine Metabolism Is Concurrently Regulated by  
1500 Synthesis and Catabolism in Both Reproductive and Vegetative Tissues. Plant  
1501 Physiology 135(1): 129.

## Parsed Citations

- Allen, A. E., C. L. Dupont, M. Oborník, A. Horák, A. Nunes-Nesi, J. P. McCrow, H. Zheng, D. A. Johnson, H. Hu, A. R. Fernie and C. Bowler (2011). Evolution and metabolic significance of the urea cycle in photosynthetic diatoms. *Nature* 473: 203.  
Google Scholar: [Author Only](#) [Title Only](#) [Author and Title](#)
- Apt, K. E., A. R. Grossman and P. G. Kroth-Pancic (1996). Stable nuclear transformation of the diatom *Phaeodactylum tricornutum*. *Molecular and General Genetics MGG* 252(5): 572-579.  
Google Scholar: [Author Only](#) [Title Only](#) [Author and Title](#)
- Apt, K. E., L. Zaslavkaia, J. C. Lippmeier, M. Lang, O. Kilian, R. Wetherbee, A. R. Grossman and P. G. Kroth (2002). In vivo characterization of diatom multipartite plastid targeting signals. *Journal of Cell Science* 115(21): 4061-4069.  
Google Scholar: [Author Only](#) [Title Only](#) [Author and Title](#)
- Armbrust, E. V., J. A. Berges, C. Bowler, B. R. Green, D. Martinez, N. H. Putnam, et al. (2004). The Genome of the Diatom *Thalassiosira Pseudonana*: Ecology, Evolution, and Metabolism. *Science* 306(5693): 79.  
Google Scholar: [Author Only](#) [Title Only](#) [Author and Title](#)
- Armbrust, E. V. (2009). The life of diatoms in the world's oceans. *Nature* 459(7244): 185-192.  
Google Scholar: [Author Only](#) [Title Only](#) [Author and Title](#)
- Asada, Y., K. Tanizawa, S. Sawada, T. Suzuki, H. Misono and K. Soda (1981). Stereochemistry of meso-alpha,epsilon-diaminopimelate decarboxylase reaction: the first evidence for pyridoxal 5'-phosphate dependent decarboxylation with inversion of configuration. *Biochemistry* 20(24): 6881-6886.  
Google Scholar: [Author Only](#) [Title Only](#) [Author and Title](#)
- Baier, M. and K.-J. Dietz (2005). Chloroplasts as source and target of cellular redox regulation: a discussion on chloroplast redox signals in the context of plant physiology. *Journal of Experimental Botany* 56(416): 1449-1462.  
Google Scholar: [Author Only](#) [Title Only](#) [Author and Title](#)
- Bhushan, R. and H. Brückner (2004). Marfey's reagent for chiral amino acid analysis: A review. *Amino Acids* 27(3): 231-247.  
Google Scholar: [Author Only](#) [Title Only](#) [Author and Title](#)
- Bowler, C., A. E. Allen, J. H. Badger, J. Grimwood, K. Jabbari, A. Kuo, et al. (2008). The *Phaeodactylum* genome reveals the evolutionary history of diatom genomes. *Nature* 456: 239.  
Google Scholar: [Author Only](#) [Title Only](#) [Author and Title](#)
- Bowler, C., A. Vardi and A. E. Allen (2009). "Oceanographic and Biogeochemical Insights from Diatom Genomes." *Annual Review of Marine Science* 2(1): 333-365.  
Google Scholar: [Author Only](#) [Title Only](#) [Author and Title](#)
- Bromke, M. A. (2013). Amino Acid biosynthesis pathways in diatoms. *Metabolites* 3(2): 294-311.  
Google Scholar: [Author Only](#) [Title Only](#) [Author and Title](#)
- Brunson, J. K., S. M. K. McKinnie, J. R. Chekan, J. P. McCrow, Z. D. Miles, E. M. Bertrand, V. A. Bielinski, H. Luhavaya, M. Oborník, G. J. Smith, D. A. Hutchins, A. E. Allen and B. S. Moore (2018). Biosynthesis of the neurotoxin domoic acid in a bloom-forming diatom. *Science* 361(6409): 1356-1358.  
Google Scholar: [Author Only](#) [Title Only](#) [Author and Title](#)
- Buchfink, B., C. Xie and D. H. Huson (2015). Fast and sensitive protein alignment using DIAMOND. *Nature Methods* 12(1): 59-60.  
Google Scholar: [Author Only](#) [Title Only](#) [Author and Title](#)
- Bukhari, A. I. and A. L. Taylor (1971). Genetic Analysis of Diaminopimelic Acid- and Lysine-Requiring Mutants of *Escherichia coli*. *Journal of Bacteriology* 105(3): 844-854.  
Google Scholar: [Author Only](#) [Title Only](#) [Author and Title](#)
- Capella-Gutiérrez, S., Silla-Martínez, J. M., & Gabaldón, T. (2009). trimAl: a tool for automated alignment trimming in large-scale phylogenetic analyses. *Bioinformatics (Oxford, England)*, 25(15), 1972–1973. <https://doi.org/10.1093/bioinformatics/btp348>  
Google Scholar: [Author Only](#) [Title Only](#) [Author and Title](#)
- Chang, Y.-F. (1978). Lysine metabolism in the rat brain: the pipecolic acid-forming pathway. *Journal of Neurochemistry* 30(2): 347-354.  
Google Scholar: [Author Only](#) [Title Only](#) [Author and Title](#)
- CCP4 (1994). The CCP4 suite: programs for protein crystallography. *Acta Crystallogr D Biol Crystallogr* 50: 760-763.  
Google Scholar: [Author Only](#) [Title Only](#) [Author and Title](#)
- Chen, V.B., Arendall, W.B., 3rd, Headd, J.J., Keedy, D.A., Immormino, R.M., Kapral, G.J., Murray, L.W., Richardson, J.S., and Richardson, D.C. (2010). MolProbity: all-atom structure validation for macromolecular crystallography. *Acta Crystallogr D Biol Crystallogr* 66: 12-21.  
Google Scholar: [Author Only](#) [Title Only](#) [Author and Title](#)
- Chu, L., D. Ewe, C. Rio Bartulos, P. G. Kroth and A. Gruber (2016). Rapid induction of GFP expression by the nitrate reductase promoter in the diatom *Phaeodactylum tricornutum*. *PeerJ* 4: e2344.  
Google Scholar: [Author Only](#) [Title Only](#) [Author and Title](#)

Cowtan, K. (2006). The Buccaneer software for automated model building. 1. Tracing protein chains. *Acta Crystallogr D Biol Crystallogr* 62: 1002-1011.

Google Scholar: [Author Only](#) [Title Only](#) [Author and Title](#)

Crooks, G. E., Hon, G., Chandonia, J. M., & Brenner, S. E. (2004). WebLogo: a sequence logo generator. *Genome Research*, 14(6), 1188–1190. <https://doi.org/10.1101/gr.849004>

Google Scholar: [Author Only](#) [Title Only](#) [Author and Title](#)

Crowther, J. M., Cross, P. J., Oliver, M. R., Leeman, M. M., Bartl, A. J., Weatherhead, A. W., North, R. A., Donovan, K. A., Griffin, M., Suzuki, H., Hudson, A. O., Kusanmascheff, M., & Dobson, R. (2019). Structure-function analyses of two plant meso-diaminopimelate decarboxylase isoforms reveal that active-site gating provides stereochemical control. *The Journal of Biological Chemistry*, 294(21), 8505–8515. <https://doi.org/10.1074/jbc.RA118.006825>

Google Scholar: [Author Only](#) [Title Only](#) [Author and Title](#)

De Lencastre, H., Wu, S.W., Pinho, M.G., Ludovice, A.M., Filipe, S., Gardete, S., Sobral, R., Gill, S., Chung, M., and Tomasz, A. (1999). Antibiotic resistance as a stress response: complete sequencing of a large number of chromosomal loci in *Staphylococcus aureus* strain COL that impact on the expression of resistance to methicillin. *Microb Drug Resist* 5:163-175.

Google Scholar: [Author Only](#) [Title Only](#) [Author and Title](#)

De Riso, V., Raniello, R., Maumus, F., Rogato, A., Bowler, C., & Falciatore, A. (2009). Gene silencing in the marine diatom *Phaeodactylum tricornutum*. *Nucleic Acids Research*, 37(14), e96. <https://doi.org/10.1093/nar/gkp448>

Google Scholar: [Author Only](#) [Title Only](#) [Author and Title](#)

DeLano, W.L. (2002). The PyMOL Molecular Graphics System. DeLano Scientific; San Carlos, CA

Google Scholar: [Author Only](#) [Title Only](#) [Author and Title](#)

Dewey, D. L., & Work, E. (1952). Diaminopimelic acid decarboxylase. *Nature*, 169(4300), 533–534. <https://doi.org/10.1038/169533a0>

Google Scholar: [Author Only](#) [Title Only](#) [Author and Title](#)

Diner, R. E., V. A. Bielinski, C. L. Dupont, A. E. Allen and P. D. Weyman (2016). Refinement of the Diatom Episome Maintenance Sequence and Improvement of Conjugation-Based DNA Delivery Methods. *Frontiers in bioengineering and biotechnology* 4: 65-65.

Google Scholar: [Author Only](#) [Title Only](#) [Author and Title](#)

Emsley, P., and Cowtan, K. (2004). Coot: model-building tools for molecular graphics. *Acta Crystallogr D Biol Crystallogr* 60: 2126-2132.

Google Scholar: [Author Only](#) [Title Only](#) [Author and Title](#)

Gibson, D. G., G. A Benders, K. C. Axelrod, J. Zaveri, M. A Algire, M. Moodie, M. G. Montague, J. C. Venter, H. O. Smith and C. A Hutchison (2008). One-step assembly in yeast of 25 overlapping DNA fragments to form a complete synthetic *Mycoplasma genitalium* genome. *Proceedings of the National Academy of Sciences* 105(51):20404.

Google Scholar: [Author Only](#) [Title Only](#) [Author and Title](#)

Gileadi, O., Burgess-Brown, N.A., Colebrook, S.M., Berridge, G., Savitsky, P., Smees, C.E., Loppnau, P., Johansson, C., Salah, E., and Pantic, N.H. (2008). High throughput production of recombinant human proteins for crystallography. *Methods Mol Biol* 426; 221-246.

Google Scholar: [Author Only](#) [Title Only](#) [Author and Title](#)

Goedhart, J., D. von Stetten, M. Noirclerc-Savoye, M. Lelimosin, L. Joosen, M. A Hink, L. van Weeren, T. W. J. Gadella and A Royant (2012). Structure-guided evolution of cyan fluorescent proteins towards a quantum yield of 93%. *Nature Communications* 3(1): 751.

Google Scholar: [Author Only](#) [Title Only](#) [Author and Title](#)

Gokulan, K., B. Rupp, M. S. Pavelka, W. R. Jacobs and J. C. Sacchettini (2003). Crystal Structure of *Mycobacterium tuberculosis* Diaminopimelate Decarboxylase, an Essential Enzyme in Bacterial Lysine Biosynthesis. *Journal of Biological Chemistry* 278(20): 18588-18596

Google Scholar: [Author Only](#) [Title Only](#) [Author and Title](#)

Griffin, M. D., J. M. Billakanti, A. Wason, S. Keller, H. D. Mertens, S. C. Atkinson, R. C. Dobson, M. A. Perugini, J. A. Gerrard and F. G. Pearce (2012). Characterisation of the first enzymes committed to lysine biosynthesis in *Arabidopsis thaliana*. *PLoS One* 7(7): e40318.

Google Scholar: [Author Only](#) [Title Only](#) [Author and Title](#)

Gruber, A and P. G. Kroth (2017). Intracellular metabolic pathway distribution in diatoms and tools for genome-enabled experimental diatom research. *Philos Trans R Soc Lond B Biol Sci* 372(1728).

Google Scholar: [Author Only](#) [Title Only](#) [Author and Title](#)

Guillou, L., M.-J. Chrétiennot-Dinet, L. K. Medlin, H. Claustre, S. L.-d. Goër and D. Vaulot (1999). *Bolidomonas*: A new genus with two species belonging to a new algal class, the Bolidophyceae (Heterokonta). *Journal of Phycology* 35(2): 368-381.

Google Scholar: [Author Only](#) [Title Only](#) [Author and Title](#)

Hor, L., M. G. Peverelli, M. A. Perugini and C. A. Hutton (2013). A new robust kinetic assay for DAP epimerase activity. *Biochimie* 95(10): 1949-1953.

Google Scholar: [Author Only](#) [Title Only](#) [Author and Title](#)

Hu, T., D. Wu, J. Chen, J. Ding, H. Jiang and X. Shen (2008). The Catalytic Intermediate Stabilized by a "Down" Active Site Loop for Diaminopimelate Decarboxylase from *Helicobacter pylori*: enzymatic characterization with crystal structure analysis. *Journal of Biological Chemistry* 283(30): 21284-21293

Google Scholar: [Author Only](#) [Title Only](#) [Author and Title](#)

Hudson, A. O., C. Bless, P. Macedo, S. P. Chatterjee, B. K. Singh, C. Gilvarg and T. Leustek (2005). Biosynthesis of lysine in plants: evidence for a variant of the known bacterial pathways. *Biochim Biophys Acta* 1721(1-3): 27-36.

Google Scholar: [Author Only](#) [Title Only](#) [Author and Title](#)

Hudson, A. O., B. K. Singh, T. Leustek and C. Gilvarg (2006). An LL-diaminopimelate aminotransferase defines a novel variant of the lysine biosynthesis pathway in plants. *Plant Physiol* 140(1): 292-301.

Google Scholar: [Author Only](#) [Title Only](#) [Author and Title](#)

Hutton, C. A., M. A. Perugini and J. A. Gerrard (2007). Inhibition of lysine biosynthesis: an evolving antibiotic strategy. *Molecular BioSystems* 3(7): 458-465.

Google Scholar: [Author Only](#) [Title Only](#) [Author and Title](#)

### **Jander G, and Joshji, V. Aspartate-derived Amino Acid Biosynthesis in**

**Arabidopsis thaliana. The Arabidopsis Book. 2009;e0121(10.1199/tab.0121):15.**

Google Scholar: [Author Only](#) [Title Only](#) [Author and Title](#)

Karas, B. J., R. E. Diner, S. C. Lefebvre, J. McQuaid, A. P. R. Phillips, C. M. Noddings, J. K. Brunson, R. E. Valas, T. J. Deerinck, J. Jablanovic, J. T. F. Gillard, K. Beeri, M. H. Ellisman, J. I. Glass, C. A. Hutchison Iii, H. O. Smith, J. C. Venter, A. E. Allen, C. L. Dupont and P. D. Weyman (2015). Designer diatom episomes delivered by bacterial conjugation. *Nature Communications* 6: 6925.

Google Scholar: [Author Only](#) [Title Only](#) [Author and Title](#)

Katoh, K. and D. M. Standley (2013). MAFFT Multiple Sequence Alignment Software Version 7: Improvements in Performance and Usability. *Molecular Biology and Evolution* 30(4): 772-780.

Google Scholar: [Author Only](#) [Title Only](#) [Author and Title](#)

Kelland, J. G., M. M. Palcic, M. A. Pickard and J. C. Vederas (1985). Stereochemistry of lysine formation by meso-diaminopimelate decarboxylase from wheat germ: use of proton-carbon-13 NMR shift correlation to detect stereospecific deuterium labeling. *Biochemistry* 24(13): 3263-3267.

Google Scholar: [Author Only](#) [Title Only](#) [Author and Title](#)

Kern, A. D., M. A. Oliveira, P. Coffino and M. L. Hackert (1999). Structure of mammalian ornithine decarboxylase at 1.6Å resolution: stereochemical implications of PLP-dependent amino acid decarboxylases. *Structure* 7(5): 567-581.

Google Scholar: [Author Only](#) [Title Only](#) [Author and Title](#)

Kidron, H., S. Repo, M. S. Johnson and T. A. Salminen (2006). Functional Classification of Amino Acid Decarboxylases from the Alanine Racemase Structural Family by Phylogenetic Studies. *Molecular Biology and Evolution* 24(1): 79-89.

Google Scholar: [Author Only](#) [Title Only](#) [Author and Title](#)

Kilian, O. and P. G. Kroth (2005). Identification and characterization of a new conserved motif within the presequence of proteins targeted into complex diatom plastids. *Plant J* 41(2): 175-183.

Google Scholar: [Author Only](#) [Title Only](#) [Author and Title](#)

Kirma, M., W. L. Araújo, A. R. Fernie and G. Galili (2012). The multifaceted role of aspartate-family amino acids in plant metabolism. *Journal of Experimental Botany* 63(14): 4995-5001.

Google Scholar: [Author Only](#) [Title Only](#) [Author and Title](#)

Knorr, S., M. Sinn, D. Galetskiy, R. M. Williams, C. Wang, N. Müller, O. Mayans, D. Schleheck and J. S. Hartig (2018). Widespread bacterial lysine degradation proceeding via glutarate and L-2-hydroxyglutarate. *Nature Communications* 9(1): 5071.

Google Scholar: [Author Only](#) [Title Only](#) [Author and Title](#)

Kosuge, T. and T. Hoshino (1998). Lysine is synthesized through the  $\alpha$ -amino adipate pathway in *Thermus thermophilus*. *FEMS Microbiology Letters* 169(2): 361-367.

Google Scholar: [Author Only](#) [Title Only](#) [Author and Title](#)

Lartillot, N., Rodrigue, N., Stubbs, D., & Richer, J. (2013). PhyloBayes MPI: phylogenetic reconstruction with infinite mixtures of profiles in a parallel environment. *Systematic Biology* 62(4), 611–615. <https://doi.org/10.1093/sysbio/syt022>

Google Scholar: [Author Only](#) [Title Only](#) [Author and Title](#)

Lauritano, C., I. Orefice, G. Procaccini, G. Romano and A. Ianora (2015). Key genes as stress indicators in the ubiquitous diatom *Skeletonema marinoi*. *BMC Genomics* 16(1): 411-411.

Google Scholar: [Author Only](#) [Title Only](#) [Author and Title](#)

Liebschner, D., Afonine, P.V., Baker, M.L., Bunkoczi, G., Chen, V.B., Croll, T.I., Hintze, B., Hung, L.W., Jain, S., McCoy, A.J., et al. (2019). Macromolecular structure determination using X-rays, neutrons and electrons: recent developments in Phenix. *Acta Crystallogr D Struct Biol* 75, 861-877.

Google Scholar: [Author Only](#) [Title Only](#) [Author and Title](#)

McCoy, A. J., N. E. Adams, A. O. Hudson, C. Gilvarg, T. Leustek and A. T. Maurelli (2006). l,l-diaminopimelate aminotransferase, a trans-kingdom enzyme shared by *Chlamydia* and plants for synthesis of diaminopimelate/lysine. *Proceedings of the National Academy of Sciences* 103(47): 17909-17914.

Google Scholar: [Author Only](#) [Title Only](#) [Author and Title](#)

McCoy, A.J., Grosse-Kunstleve, R.W., Adams, P.D., Winn, M.D., Storoni, L.C., and Read, R.J. (2007). Phaser crystallographic software. *J Appl Crystallogr* 40: 658-674.

Google Scholar: [Author Only](#) [Title Only](#) [Author and Title](#)

Mills, W. R., P. J. Lea and B. J. Mifflin (1980). Photosynthetic Formation of the Aspartate Family of Amino Acids in Isolated Chloroplasts. *Plant Physiology* 65(6): 1166-1172.

Google Scholar: [Author Only](#) [Title Only](#) [Author and Title](#)

Mock, T., R. P. Otilar, J. Strauss, M. McMullan, P. Paajanen, J. Schmutz, et al. (2017). Evolutionary genomics of the cold-adapted diatom *Fragilariopsis cylindrus*. *Nature* 541(7638): 536-540.

Google Scholar: [Author Only](#) [Title Only](#) [Author and Title](#)

Moosburner, M. A., P. Gholami, J. K. McCarthy, M. Tan, V. A. Bielinski and A. E. Allen (2020). Multiplexed Knockouts in the Model Diatom *Phaeodactylum* by Episomal Delivery of a Selectable Cas9. *Frontiers in Microbiology* 11: 5.

Google Scholar: [Author Only](#) [Title Only](#) [Author and Title](#)

Nguyen, L.-T., H. A. Schmidt, A. von Haeseler and B. Q. Minh (2014). IQ-TREE: A Fast and Effective Stochastic Algorithm for Estimating Maximum-Likelihood Phylogenies. *Molecular Biology and Evolution* 32(1): 268-274.

Google Scholar: [Author Only](#) [Title Only](#) [Author and Title](#)

Niesen, F.H., Berglund, H., and Vedadi, M. (2007). The use of differential scanning fluorimetry to detect ligand interactions that promote protein stability. *Nat Protoc* 2: 2212-2221.

Google Scholar: [Author Only](#) [Title Only](#) [Author and Title](#)

Perl, A., O. Shaul and G. Galili (1992). Regulation of lysine synthesis in transgenic potato plants expressing a bacterial dihydrodipicolinate synthase in their chloroplasts. *Plant Molecular Biology* 19(5): 815-823.

Google Scholar: [Author Only](#) [Title Only](#) [Author and Title](#)

Peverelli, M. G. and M. A. Perugini (2015). An optimized coupled assay for quantifying diaminopimelate decarboxylase activity. *Biochimie* 115: 78-85.

Google Scholar: [Author Only](#) [Title Only](#) [Author and Title](#)

Peverelli, M. G., T. P. Soares da Costa, N. Kirby and M. A. Perugini (2016). Dimerization of Bacterial Diaminopimelate Decarboxylase Is Essential for Catalysis. *Journal of Biological Chemistry* 291(18): 9785-9795.

Google Scholar: [Author Only](#) [Title Only](#) [Author and Title](#)

Pollak, B., A. Cerda, M. Delmans, S. Álamos, T. Moyano, A. West, R. A. Gutiérrez, N. J. Patron, F. Federici and J. Haseloff (2019). Loop assembly: a simple and open system for recursive fabrication of DNA circuits. *New Phytologist* 222(1): 628-640.

Google Scholar: [Author Only](#) [Title Only](#) [Author and Title](#)

Poulsen, N. and N. Kröger (2005). A new molecular tool for transgenic diatoms. *The FEBS Journal* 272(13): 3413-3423.

Google Scholar: [Author Only](#) [Title Only](#) [Author and Title](#)

Pratelli, R. and G. Pilot (2014). Regulation of amino acid metabolic enzymes and transporters in plants. *Journal of Experimental Botany* 65(19): 5535-5556.

Google Scholar: [Author Only](#) [Title Only](#) [Author and Title](#)

Price, M. N., G. M. Zane, J. V. Kuehl, R. A. Melnyk, J. D. Wall, A. M. Deutschbauer and A. P. Arkin (2018). Filling gaps in bacterial amino acid biosynthesis pathways with high-throughput genetics. *PLOS Genetics* 14(1): e1007147.

Google Scholar: [Author Only](#) [Title Only](#) [Author and Title](#)

Ray, S. S., J. B. Bonanno, K. R. Rajashankar, M. G. Pinho, G. He, H. De Lencastre, A. Tomasz and S. K. Burley (2002). Cocrystal Structures of Diaminopimelate Decarboxylase: Mechanism, Evolution, and Inhibition of an Antibiotic Resistance Accessory Factor. *Structure* 10(11): 1499-1508.

Google Scholar: [Author Only](#) [Title Only](#) [Author and Title](#)

Raymond, J. A. and H. J. Kim (2012). Possible role of horizontal gene transfer in the colonization of sea ice by algae. *PloS one* 7(5): e35968-e35968.

Google Scholar: [Author Only](#) [Title Only](#) [Author and Title](#)

Reyes-Prieto, A. and A. Moustafa (2012). Plastid-localized amino acid biosynthetic pathways of Plantae are predominantly composed of non-cyanobacterial enzymes. *Sci Rep* 2: 955.

Google Scholar: [Author Only](#) [Title Only](#) [Author and Title](#)

Rosenwasser, S., S. Graff van Creveld, D. Schatz, S. Malitsky, O. Tzfadia, A. Aharoni, Y. Levin, A. Gabashvili, E. Feldmesser and A. Vardi (2014). Mapping the diatom redox-sensitive proteome provides insight into response to nitrogen stress in the marine environment. *Proc Natl Acad Sci U S A* 111(7): 2740-2745.

Google Scholar: [Author Only](#) [Title Only](#) [Author and Title](#)

Sagong, H. Y. and K. J. Kim (2017). Structural basis for redox sensitivity in *Corynebacterium glutamicum* diaminopimelate epimerase: an enzyme involved in L-lysine biosynthesis. *Sci Rep* 7: 42318.

Google Scholar: [Author Only](#) [Title Only](#) [Author and Title](#)

Savitsky, P., J. Bray, C. D. O. Cooper, B. D. Marsden, P. Mahajan, N. A. Burgess-Brown and O. Gileadi (2010). High-throughput production of human proteins for crystallization: The SGC experience. *Journal of Structural Biology* 172(1): 3-13.

Google Scholar: [Author Only](#) [Title Only](#) [Author and Title](#)

Siaut, M., M. Heijde, M. Mangogna, A. Montsant, S. Coesel, A. Allen, A. Manfredonia, A. Falciatore and C. Bowler (2007). Molecular toolbox for studying diatom biology in *Phaeodactylum tricornutum*. *Gene* 406(1): 23-35.

Google Scholar: [Author Only](#) [Title Only](#) [Author and Title](#)

Smith, S. R., J. T. Gillard, A. B. Kustka, J. P. McCrow, J. H. Badger, H. Zheng, A. M. New, C. L. Dupont, T. Obata, A. R. Fernie and A. E. Allen (2016). Transcriptional Orchestration of the Global Cellular Response of a Model Pennate Diatom to Diel Light Cycling under Iron Limitation. *PLoS Genet* 12(12): e1006490.

Google Scholar: [Author Only](#) [Title Only](#) [Author and Title](#)

Smith, S. R., C. L. Dupont, J. K. McCarthy, J. T. Broddrick, M. Oborník, A. Horák, Z. Füßy, J. Cihlář, S. Kleessen, H. Zheng, J. P. McCrow, K. K. Hixson, W. L. Araújo, A. Nunes-Nesi, A. Fernie, Z. Nikoloski, B. O. Palsson and A. E. Allen (2019). Evolution and regulation of nitrogen flux through compartmentalized metabolic networks in a marine diatom. *Nature Communications* 10(1): 4552.

Google Scholar: [Author Only](#) [Title Only](#) [Author and Title](#)

Son, H. F. and K.-J. Kim (2018). Structural basis for substrate specificity of meso-diaminopimelic acid decarboxylase from *Corynebacterium glutamicum*. *Biochemical and Biophysical Research Communications* 495(2): 1815-1821.

Google Scholar: [Author Only](#) [Title Only](#) [Author and Title](#)

Steinegger, M. and J. Söding (2017). MMseqs2 enables sensitive protein sequence searching for the analysis of massive data sets. *Nature Biotechnology* 35(11): 1026-1028.

Google Scholar: [Author Only](#) [Title Only](#) [Author and Title](#)

Strand, T. A., R. Lale, K. F. Degnes, M. Lando and S. Valla (2014). A New and Improved Host-Independent Plasmid System for RK2-Based Conjugal Transfer. *PLOS ONE* 9(3): e90372.

Google Scholar: [Author Only](#) [Title Only](#) [Author and Title](#)

Sugio, S., G. A. Petsko, J. M. Manning, K. Soda and D. Ringe (1995). Crystal Structure of a D-Amino Acid Aminotransferase: How the Protein Controls Stereoselectivity. *Biochemistry* 34(30): 9661-9669.

Google Scholar: [Author Only](#) [Title Only](#) [Author and Title](#)

Velasco, A. M., J. I. Leguina and A. Lazcano (2002). Molecular Evolution of the Lysine Biosynthetic Pathways. *Journal of Molecular Evolution* 55(4): 445-449.

Google Scholar: [Author Only](#) [Title Only](#) [Author and Title](#)

Wallsgrave, R. M. and M. Mazelis (1980). The enzymology of lysine biosynthesis in higher plants: Complete localization of the regulatory enzyme dihydrodipicolinate synthase in the chloroplasts of spinach leaves. *FEBS Letters* 116(2): 189-192.

Google Scholar: [Author Only](#) [Title Only](#) [Author and Title](#)

Wang, H.-C., B. Q. Minh, E. Susko and A. J. Roger (2017). Modeling Site Heterogeneity with Posterior Mean Site Frequency Profiles Accelerates Accurate Phylogenomic Estimation. *Systematic Biology* 67(2): 216-235.

Google Scholar: [Author Only](#) [Title Only](#) [Author and Title](#)

Weyand, S., Kefala, G., Svergun, D.I., and Weiss, M.S. (2009). The three-dimensional structure of diaminopimelate decarboxylase from *Mycobacterium tuberculosis* reveals a tetrameric enzyme organisation. *J Struct Funct Genomics* 10: 209-217.

Google Scholar: [Author Only](#) [Title Only](#) [Author and Title](#)

Weyman, P. D., K. Beeri, S. C. Lefebvre, J. Rivera, J. K. McCarthy, A. L. Heuberger, G. Peers, A. E. Allen and C. L. Dupont (2015). Inactivation of *Phaeodactylum tricornutum* urease gene using transcription activator-like effector nuclease-based targeted mutagenesis. *Plant Biotechnology Journal* 13(4): 460-470.

Google Scholar: [Author Only](#) [Title Only](#) [Author and Title](#)

White, P. J. and B. Kelly (1965). Purification and properties of diaminopimelate decarboxylase from *Escherichia coli*. *The Biochemical Journal* 96(1): 75-84.

Google Scholar: [Author Only](#) [Title Only](#) [Author and Title](#)

Winn, M.D., Ballard, C.C., Cowtan, K.D., Dodson, E.J., Emsley, P., Evans, P.R., Keegan, R.M., Krissinel, E.B., Leslie, A.G., McCoy, A., et al. (2011). Overview of the CCP4 suite and current developments. *Acta Crystallogr D Biol Crystallogr* 67: 235-242.

Google Scholar: [Author Only](#) [Title Only](#) [Author and Title](#)

Xu, H., B. Andi, J. Qian, A. H. West and P. F. Cook (2006). The  $\alpha$ -amino adipate pathway for lysine biosynthesis in fungi. *Cell Biochemistry and Biophysics* 46(1): 43-64.

Google Scholar: [Author Only](#) [Title Only](#) [Author and Title](#)

Zhu, X. and G. Galili (2004). Lysine Metabolism Is Concurrently Regulated by Synthesis and Catabolism in Both Reproductive and Vegetative Tissues. *Plant Physiology* 135(1): 129.

Google Scholar: [Author Only](#) [Title Only](#) [Author and Title](#)
